# Supplementary material for: Dynamic stability of a blue multi-resonance thermally activated delayed fluorescence molecule without damaging the luminescence properties
Source: Royal Society of Chemistry journal article supplement (doi:10.1039/d2cp04848e), 2023-01-01
Supplement: d2cp04848e1.pdf [file d2cp04848e1.pdf]

## Supporting Information

### Dynamic Stability for the Modification of a Blue Multi-Resonance

### Thermally Activated Delayed Fluorescence Molecule without

### Damaging Luminescent Properties

Heming Zhang,<sup>a,\*</sup> Lianbao Ke,<sup>a</sup> Yufang Nie,<sup>a,b</sup> Jiakuan Wang,<sup>a</sup> Hai Bi<sup>a,\*</sup>

a. Jihua Laboratory, Huandaonan road #28, Nanhai district, Foshan, Guangdong Province, China;

b. South China Normal University, West of Zhongshan Avenue #55, Tianhe District, Guangzhou City.

Mail: zhangheming@jihualab.com

#### Theory Background

Rate constants can be described by Fermi's Golden Rule, as follows:

$$k_{if} = \frac{2\pi}{\hbar} |\langle \Psi_f | H' | \Psi_i \rangle|^2 \delta(E_{fv'} - E_{iv}) \quad (1)$$

where  $i$  and  $f$  represent the initial and final states,  $v$  and  $v'$  represents vibrational states of the initial state and final state.  $H'$  is Hamiltonian perturbation operator.  $E_{iv}$  and  $E_{fv'}$  are the

energies of initial and final state. The wavefunction is expressed as:  $|\Psi_i\rangle = |\Phi_i\rangle|\Theta_v\rangle$  and

$|\Psi_f\rangle = |\Phi_f\rangle|\Theta_{v'}\rangle$ ,  $\Phi$  and  $\Theta$  electron wavefunction and vibration wavefunction. The

perturbation matrix element  $\langle \Psi_f | H' | \Psi_i \rangle$  can be expressed in different formation for different natures of transition processes.

The spectrum of a radiative transition is expressed as<sup>1-3</sup>:

$$\sigma_{emi}(\omega, T) = \frac{4\omega^3}{3\hbar c^3} \sum_{v,v'} P_{iv}(T) |\langle \Theta_{v'} | \mu_0 | \Theta_v \rangle|^2 \delta(\omega_{iv, fv'} - \omega) \quad (2)$$

where  $\omega$  is the circular frequency,  $\mu_0 = |\langle \Phi_f | \vec{\mu}_0 | \Phi_i \rangle|$  is the transition dipole moment,

$P_{iv}(T)$  is the Boltzmann distribution. The integral form of this emission rate constant  $k_r$  is expressed as follows<sup>1-3</sup>:

$$k_r(T) = \int_0^{+\infty} \sigma_{emi}(\omega, T) d\omega \quad (3)$$

27 The rate constant of internal conversion (IC) is expressed as<sup>4-6</sup>:

$$28 \quad k_{IC} = \frac{2\pi}{\hbar} \sum_{v,v'} P_{iv} |\langle \Phi_f \Theta_{fv'} | \hat{H}_{BO} | \Phi_i \Theta_{iv} \rangle|^2 \delta(E_{fv'} - E_{iv}) \quad (4)$$

29 Where,  $\hat{H}_{BO}$  is Born-Oppenheimer operator.

30 The rate constant of intersystem crossing (ISC) is expressed as<sup>7</sup>:

$$31 \quad k_{ISC} = \frac{2\pi}{\hbar} \sum_{v,v'} P_{iv} |\langle \Phi_f \Theta_{fv'} | \hat{H}_{SO} | \Phi_i \Theta_{iv} \rangle|^2 \delta(E_{fv'} - E_{iv}) \quad (5)$$

32 where,  $\langle \Phi_f | \hat{H}_{SO} | \Phi_i \rangle$  is electron spin-orbit coupling constant.

33 The calculation of reaction rate constant based on the transitional state theory (TST)  
34 using Eyring's equation<sup>8-9</sup>:

$$35 \quad k_{reaction} = \kappa \frac{k_b T}{\hbar} \exp \left[ -\frac{\Delta G^\ddagger}{RT} \right] \quad (6)$$

36 Where,  $\kappa = 1 + \frac{1}{24} \left( \frac{\hbar v^\ddagger}{k_b T} \right)^2$  which is Wigner's expression for quantum tunneling<sup>9</sup>,  $k_b$  is Boltzmann  
37 distribution coefficient,  $T$  is temperature,  $\Delta G^\ddagger$  is activation free energy,  $R$  is the ideal gas constant,  
38  $v^\ddagger$  is the imaginal frequency at the transition state.

39

40 **Supplemented Data**

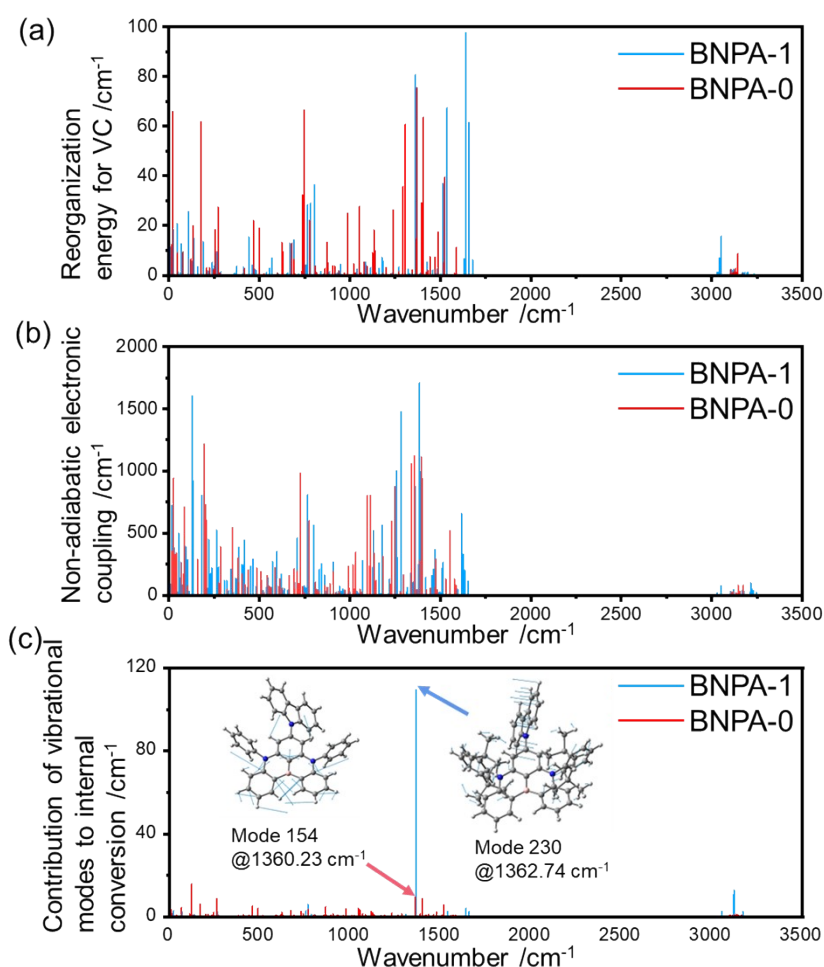

41  
 42 **Figure S1.** More details of the internal conversions of BNPA-0 and BNPA-1, (a)  
 43 reorganization energies for vibronic coupling, (b) electronic couplings, (c) contributions of  
 44 the vibrational modes to the internal conversions.

45  
 46 The  $k_{IC}$  of BNPA-1 is several orders of magnitude higher than that of BNPA-0. The  
 47 details are shown in Figure S1. Figure S1 (a) shows the vibronic couplings and (b) shows the  
 48 electronic couplings. Both the couplings shows no significant difference. However, the rate  
 49 constant is consist of both the vibronic and the electronic couplings. Figure S1 (c) shows the  
 50 total contribution of vibronic and electronic couplings to the rate constant at the energy of  
 51 each vibrational modes. A significant difference is observed than at around 1360  $\text{cm}^{-1}$  the  
 52 intensity of BNPA-1 is about 100  $\text{cm}^{-1}$  while for BNPA-0 the intensity is no larger than 20  
 53  $\text{cm}^{-1}$ . For BNPA-1 the mode at 1362.74  $\text{cm}^{-1}$  distributes almost on the entire molecule  
 54 including the tert-butyl groups while for BNPA-0 the mode at 1360.23  $\text{cm}^{-1}$  mainly distributes  
 55 on the resonance core moiety.

56  
 57

**Table S1.** The calculated reaction rate constants evaluated at 298.15 K.

| Transition state                 | $\Delta G^\ddagger$ /kcal mol <sup>-1</sup> | Imaginary frequency<br>/cm <sup>-1</sup> | Rate constant /s <sup>-1</sup> |
|----------------------------------|---------------------------------------------|------------------------------------------|--------------------------------|
| <sup>3</sup> TS <sub>1-1</sub> * | 32.05                                       | -381.70                                  | 2.19×10 <sup>-11</sup>         |

|                         |       |         |                        |
|-------------------------|-------|---------|------------------------|
| ${}^3\text{TS}_{2-1}^*$ | 28.44 | -612.65 | $1.17 \times 10^{-8}$  |
| ${}^3\text{TS}_{1-2}^*$ | 12.77 | -212.25 | $2.78 \times 10^3$     |
| ${}^3\text{TS}_{2-2}^*$ | 2.09  | -77.65  | $1.83 \times 10^{11}$  |
| ${}^3\text{TS}_3^*$     | 30.08 | -666.64 | $7.66 \times 10^{-10}$ |

58

59 For both Path 1 and Path 2 of BNPA-0, the first elementary reaction is the rate-limiting  
60 step with highest  $\Delta G^\ddagger$ . For Path 2 the  $\Delta G^\ddagger$  ( $28.44 \text{ kcal mol}^{-1}$ ) is lower than that of Path 1 ( $32.05$   
61  $\text{ kcal mol}^{-1}$ ). Therefore, Path 2 is the main reaction path. Then quantum yields of both the reaction  
62 paths can be calculated using the following equation.

$$\Phi_{reaction} = \frac{k_{reaction}}{k_{rISC} + k_{Phos.} + k_{ISC} + k_{reaction}}$$

63

64 The  $\Phi_{reaction}$  for Path 2 and Path 1 are calculated to be  $8.93 \times 10^{-13}$  and  $1.67 \times 10^{-15}$  (the rate  
65 constant for the potential energy surface crossing through conical intersection is difficult to  
66 evaluate and it is ignored here). Both the  $\Phi_{reaction}$  are tiny. However, the OLED emitters are  
67 expected to endure thousands, hundreds of thousand hours, or even longer operation time before  
68 the luminescent intensity decrease to 80% of the initial brightness. To evaluate the  $t_{80}$  and  $t_{50}$  (the  
69 time consumed when the brightness descends to 80% and 50%) the reaction kinetics were derived  
70 for Path 2. The reaction equations are listed as the follows:

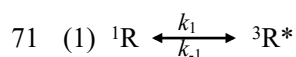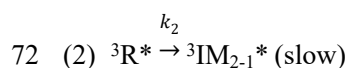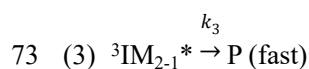

74 For  ${}^1\text{R}$ , its reaction rate is expressed as

75  $dc({}^1\text{R})/dt = -k_1 c({}^1\text{R}) + k_{-1} c({}^3\text{R}^*)$ .

76 For  ${}^3\text{R}^*$  as an active specie in excited state, its concentration approximately keeps as a constant.

77  $dc({}^3\text{R}^*)/dt = k_1 c({}^1\text{R}) - k_{-1} c({}^3\text{R}^*) - k_2 c({}^3\text{R}^*) = 0$ .

78 Then,  $c({}^3\text{R}^*) = [k_1/(k_{-1} + k_2)] c({}^1\text{R})$ .

79  $dc({}^1\text{R})/dt = -k_1 c({}^1\text{R}) + k_{-1} c({}^3\text{R}^*) = -k_1 c({}^1\text{R}) + [k_1 k_{-1}/(k_{-1} + k_2)] c({}^1\text{R}) = -k_1 k_2/(k_{-1} + k_2) c({}^1\text{R})$

80 Considering that  $k_2 \ll k_{-1}$  ( $k_{-1}$  represent the total rate constant for the reactant to decay from the  
81 excited state),  $dc({}^1\text{R})/dt \approx -k_1 k_2/k_{-1} c({}^1\text{R})$ .

82 This equation describes the consumption rate of the reactant and it is a first order reaction. Now,  
83 the  $k_1$  representing the rate constant to generate  ${}^3\text{R}^*$  containing the ISC and excitation is unknow.  
84 If we roughly make  $k_1 \approx k_{-1}$ , then it is possible to make a coarse evaluation of the  $t_{80}$  and  $t_{50}$ . If the  
85 concentration of the reactant and the luminescence intensity  $L$  are approximately in a linear  
86 relation like  $c({}^1\text{R}) = k L$ , the equation above can be converted into  $dL/dt = -k_2 L$ .

87 Then, this differential equation is resolved to give

88  $\ln(L_t/L_0) = -k_2 t$ ,

89 where  $L_t$  is the luminescence intensity at time  $t$  and  $L_0$  is the initial luminescence intensity.

90 Thus, when the luminescence intensity drops to its 80% the  $t_{80}$  is

91  $t_{80} = -\ln 0.8/k_2 = 5297.81 \text{ hours}$ .

92  $t_{50}$  can also be calculated as  $t_{50} = -\ln 0.5/k_2 = 16456.49 \text{ hours}$ .

93 Based on the same calculation, the  $\Phi_{reaction}$  can be evaluated for BNPA-1. The rate constant

94 for the potential energy surface crossing through conical intersection is difficult to evaluate. If it is  
 95 ignored the  $\Phi_{reaction}$  is  $1.09 \times 10^{-15}$  which is much lower than that of BNPA-0. The conical  
 96 intersection can make the difference even larger. The  $t_{50}$  and  $t_{80}$  of BNPA-1 can also be calculated  
 97 to be 80919.48 hours and 251358.86 hours based on the same derivation and approximation of the  
 98 reaction kinetics. Obviously the  $t_{50}$  and  $t_{80}$  of BNPA-1 are much improved comparing those of  
 99 BNPA-0. The ignored conical intersection can enlarge the  $k_{-1}$  and make the consumption rate of  
 100 the reactant slower according to the equation  $dc(^1R)/dt \approx -k_1k_2/k_{-1}c(^1R)$ . Both the  $\Phi_{reaction}$  and  $t_{50}$   
 101 and  $t_{80}$  show BNPA-1 is more stable than BNPA-0 in triplet state.

102 These results indicate that to ensure a very long operation lifetime (like thousands of hours or  
 103 even hundreds of thousand hours) for the requirement of industrialization of OLED, the reaction  
 104 rate constant should be extremely small. On the other hand, it should be noticed that the estimated  
 105  $t_{50}$  and  $t_{80}$  are larger than most of the reported operation half lifetimes of OLEDs. They are over  
 106 estimated which may be due to the coarse approximations we made during the calculation. The  
 107 calculations above are rather ideal. Many factors in a real OLED device are neglected or difficult  
 108 to be considered. However, it qualitatively indicates the modification of BNPA-0 can raise the  
 109 stability in triplet state.

110

111

**Table S2.** The calculated geometries optimized in  $S_0$  state

| BNPA-0 |             |             |             |
|--------|-------------|-------------|-------------|
| Atoms  | X/Angstrom  | Y/Angstrom  | Z/Angstrom  |
| C      | -1.25910600 | 0.00000000  | 0.00000000  |
| C      | -0.58038600 | -1.20989400 | -0.15719900 |
| C      | -0.58038600 | 1.20989400  | 0.15720000  |
| C      | 0.82415100  | -1.21186500 | -0.13136700 |
| H      | -1.14613800 | -2.12095600 | -0.32072300 |
| N      | -2.67519900 | 0.00000000  | 0.00000100  |
| C      | 0.82415100  | 1.21186500  | 0.13136600  |
| H      | -1.14613800 | 2.12095600  | 0.32072400  |
| N      | 1.51438700  | -2.42031900 | -0.24265700 |
| C      | 1.55635200  | 0.00000000  | 0.00000000  |
| C      | -3.49375700 | 0.88581000  | -0.71514100 |
| C      | -3.49375700 | -0.88581000 | 0.71514300  |
| N      | 1.51438700  | 2.42031900  | 0.24265600  |
| C      | 2.90641200  | -2.51532200 | -0.40327100 |
| C      | 0.73218500  | -3.62702000 | -0.22715000 |
| B      | 3.07083700  | 0.00000000  | -0.00000100 |
| C      | -3.14512400 | 1.91646300  | -1.59593200 |
| C      | -4.85336700 | 0.56357300  | -0.45594900 |
| C      | -3.14512300 | -1.91646300 | 1.59593400  |
| C      | -4.85336700 | -0.56357300 | 0.45595200  |
| C      | 2.90641200  | 2.51532200  | 0.40327000  |
| C      | 0.73218500  | 3.62702000  | 0.22715000  |
| C      | 3.47904000  | -3.78794000 | -0.62989000 |
| C      | 3.73136300  | -1.35381900 | -0.35117300 |

|   |             |             |             |
|---|-------------|-------------|-------------|
| C | 0.40087100  | -4.21174900 | 0.99719000  |
| C | 0.27964000  | -4.18575800 | -1.42481900 |
| C | 3.73136300  | 1.35381900  | 0.35117100  |
| C | -4.17911400 | 2.63547100  | -2.19643600 |
| H | -2.10358300 | 2.15169200  | -1.80934700 |
| C | -5.87228100 | 1.30143700  | -1.07177700 |
| C | -4.17911300 | -2.63547100 | 2.19643800  |
| H | -2.10358200 | -2.15169200 | 1.80934800  |
| C | -5.87228100 | -1.30143700 | 1.07178000  |
| C | 3.47904000  | 3.78794000  | 0.62988800  |
| C | 0.40087000  | 4.21174900  | -0.99719100 |
| C | 0.27964000  | 4.18575800  | 1.42481900  |
| C | 4.83975900  | -3.91145300 | -0.87189700 |
| H | 2.85251800  | -4.67746300 | -0.63179300 |
| C | 5.10293200  | -1.53370100 | -0.64723100 |
| C | -0.39221100 | -5.36140900 | 1.02330500  |
| H | 0.76429600  | -3.75462100 | 1.91873300  |
| C | -0.51047300 | -5.33731200 | -1.39521700 |
| H | 0.54709300  | -3.70849700 | -2.36861400 |
| C | 5.10293300  | 1.53370200  | 0.64722900  |
| C | -5.52979900 | 2.33906600  | -1.93690700 |
| H | -3.92919500 | 3.44633700  | -2.88383000 |
| H | -6.91964900 | 1.06109000  | -0.87760500 |
| C | -5.52979800 | -2.33906700 | 1.93690900  |
| H | -3.92919300 | -3.44633800 | 2.88383200  |
| H | -6.91964800 | -1.06109100 | 0.87760800  |
| C | 4.83976000  | 3.91145300  | 0.87189400  |
| H | 2.85251800  | 4.67746300  | 0.63179100  |
| C | -0.39221200 | 5.36140900  | -1.02330500 |
| H | 0.76429500  | 3.75462100  | -1.91873300 |
| C | -0.51047200 | 5.33731200  | 1.39521700  |
| H | 0.54709400  | 3.70849700  | 2.36861400  |
| C | 5.66232300  | -2.77711000 | -0.90787600 |
| H | 5.26004400  | -4.90334300 | -1.05280800 |
| H | 5.74318700  | -0.65412500 | -0.69564700 |
| C | -0.84891400 | -5.92429500 | -0.17215200 |
| H | -0.65517200 | -5.81754900 | 1.97963500  |
| H | -0.86754900 | -5.77385100 | -2.32990800 |
| C | 5.66232300  | 2.77711100  | 0.90787300  |
| H | 5.74318700  | 0.65412500  | 0.69564400  |
| H | -6.31339400 | 2.92428700  | -2.42166900 |
| H | -6.31339200 | -2.92428700 | 2.42167200  |
| H | 5.26004400  | 4.90334300  | 1.05280600  |
| C | -0.84891500 | 5.92429500  | 0.17215300  |

|   |             |             |             |
|---|-------------|-------------|-------------|
| H | -0.65517300 | 5.81754900  | -1.97963500 |
| H | -0.86754800 | 5.77385100  | 2.32990900  |
| H | 6.72576300  | -2.87033900 | -1.13546100 |
| H | -1.47151200 | -6.82077700 | -0.15076200 |
| H | 6.72576300  | 2.87034000  | 1.13545800  |
| H | -1.47151200 | 6.82077700  | 0.15076200  |

---

BNPA-1

---

|   |             |             |             |
|---|-------------|-------------|-------------|
| C | -0.00001300 | -1.48626900 | 0.00000700  |
| C | 1.22048700  | -0.81593100 | -0.03837600 |
| C | -1.22050400 | -0.81591400 | 0.03838100  |
| C | 1.22031700  | 0.58989200  | -0.04593800 |
| H | 2.14229800  | -1.38880800 | -0.06002900 |
| N | -0.00002300 | -2.90690900 | 0.00001900  |
| C | -1.22031600 | 0.58990800  | 0.04592300  |
| H | -2.14232300 | -1.38877900 | 0.06004200  |
| N | 2.42907400  | 1.27401000  | -0.07520500 |
| C | 0.00000500  | 1.31881300  | -0.00001300 |
| C | 0.47809400  | -3.71801800 | -1.02890300 |
| C | -0.47813300 | -3.71799400 | 1.02896500  |
| N | -2.42906300 | 1.27404300  | 0.07518100  |
| C | 2.53826000  | 2.66615800  | -0.16925400 |
| C | 3.64015300  | 0.49071200  | -0.05561100 |
| B | 0.00001500  | 2.83405700  | -0.00002400 |
| C | 1.01633400  | -3.34934200 | -2.26519200 |
| C | 0.30583400  | -5.08015400 | -0.65822100 |
| C | -1.01637200 | -3.34928700 | 2.26524400  |
| C | -0.30586700 | -5.08013800 | 0.65831800  |
| C | -2.53823100 | 2.66619300  | 0.16921000  |
| C | -3.64015300 | 0.49076100  | 0.05560200  |
| C | 3.82925100  | 3.24015500  | -0.23340600 |
| C | 1.38090900  | 3.49586300  | -0.21415700 |
| C | 4.18686700  | 0.12634800  | 1.20131300  |
| C | 4.23083500  | 0.10836200  | -1.28980600 |
| C | -1.38086900 | 3.49588300  | 0.21409800  |
| C | 1.40645200  | -4.37239300 | -3.12994000 |
| H | 1.12121500  | -2.30027500 | -2.54041200 |
| C | 0.70582700  | -6.08684600 | -1.54719800 |
| C | -1.40648400 | -4.37231700 | 3.13002100  |
| H | -1.12125600 | -2.30021400 | 2.54043700  |
| C | -0.70585500 | -6.08680900 | 1.54732200  |
| C | -3.82921500 | 3.24020800  | 0.23335400  |
| C | -4.18687600 | 0.12638800  | -1.20131500 |
| C | -4.23083800 | 0.10843800  | 1.28980400  |
| C | 3.98265400  | 4.60573900  | -0.42305600 |

|   |             |             |             |
|---|-------------|-------------|-------------|
| H | 4.70946800  | 2.60738600  | -0.14813800 |
| C | 1.59566900  | 4.87363000  | -0.45691200 |
| C | 5.36012200  | -0.64611100 | 1.18360100  |
| C | 5.42332900  | -0.62940600 | -1.21765900 |
| C | -1.59561200 | 4.87365800  | 0.45683200  |
| C | 1.25826400  | -5.72722200 | -2.77620200 |
| H | 1.83340700  | -4.11292500 | -4.10091200 |
| H | 0.58270000  | -7.13862300 | -1.28039600 |
| C | -1.25829100 | -5.72715400 | 2.77631700  |
| H | -1.83343800 | -4.11282500 | 4.10098600  |
| H | -0.58272400 | -7.13859200 | 1.28054700  |
| C | -3.98259900 | 4.60579700  | 0.42298300  |
| H | -4.70944000 | 2.60744900  | 0.14809700  |
| C | -5.36014400 | -0.64605100 | -1.18358900 |
| C | -5.42334300 | -0.62931300 | 1.21767100  |
| C | 2.86050200  | 5.43349900  | -0.56800600 |
| H | 4.98945300  | 5.02576900  | -0.47730700 |
| H | 0.72976400  | 5.52021400  | -0.58634700 |
| C | 5.97935400  | -1.01000600 | -0.00357800 |
| C | -2.86043700 | 5.43354500  | 0.56791900  |
| H | -0.72969700 | 5.52023300  | 0.58625700  |
| H | 1.57523900  | -6.50292500 | -3.47567700 |
| H | -1.57526200 | -6.50284000 | 3.47581300  |
| H | -4.98939300 | 5.02584100  | 0.47722800  |
| C | -5.97937900 | -1.00991900 | 0.00359700  |
| H | 2.97958900  | 6.50134600  | -0.75950800 |
| H | 6.89934600  | -1.59783500 | 0.01624400  |
| H | -2.97951000 | 6.50139600  | 0.75940400  |
| H | -6.89938100 | -1.59773300 | -0.01621400 |
| H | 5.80439700  | -0.96933600 | 2.12355100  |
| H | 5.93101100  | -0.92066000 | -2.13492000 |
| H | -5.80442800 | -0.96928000 | -2.12353300 |
| H | -5.93102800 | -0.92054500 | 2.13493700  |
| C | -3.74773800 | 0.44464500  | 2.73240300  |
| C | -3.63539200 | 0.44771800  | -2.62134300 |
| C | 3.74774400  | 0.44455500  | -2.73241100 |
| C | 3.63538200  | 0.44770500  | 2.62133500  |
| C | 2.43458700  | 1.40464100  | 2.74362400  |
| H | 2.63378900  | 2.39263000  | 2.31081700  |
| H | 1.51610900  | 1.00190200  | 2.30379500  |
| H | 2.23719600  | 1.55290800  | 3.81695800  |
| C | 3.21140400  | -0.89030500 | 3.27132000  |
| H | 4.04023500  | -1.61185100 | 3.32024000  |
| H | 2.85513600  | -0.71319500 | 4.29908800  |



|   |             |             |             |
|---|-------------|-------------|-------------|
| H | 2.39097700  | -1.35406400 | 2.70172900  |
| C | 4.77191000  | 1.09721500  | 3.44806100  |
| H | 5.65756400  | 0.45447500  | 3.54559200  |
| H | 5.08952100  | 2.04546500  | 2.98591700  |
| H | 4.41034900  | 1.31888400  | 4.46451400  |
| C | 4.71282900  | 1.49987000  | -3.31954800 |
| H | 4.64205800  | 2.44673000  | -2.76402500 |
| H | 5.75869900  | 1.15849800  | -3.28507400 |
| H | 4.45430600  | 1.70190200  | -4.37191400 |
| C | 2.31329000  | 0.98061700  | -2.90726500 |
| H | 1.55842800  | 0.28635000  | -2.51616800 |
| H | 2.15694000  | 1.96433400  | -2.45284300 |
| H | 2.12749500  | 1.09301500  | -3.98678400 |
| C | 3.81955400  | -0.84233600 | -3.59334300 |
| H | 3.39742500  | -0.64049100 | -4.59000700 |
| H | 4.84565000  | -1.20408700 | -3.74556600 |
| H | 3.24099000  | -1.65718600 | -3.13275900 |
| C | -4.71280500 | 1.49998400  | 3.31952500  |
| H | -5.75868000 | 1.15862800  | 3.28505900  |
| H | -4.45427600 | 1.70202800  | 4.37188800  |
| H | -4.64202000 | 2.44683400  | 2.76398800  |
| C | -2.31327500 | 0.98068600  | 2.90724600  |
| H | -1.55842500 | 0.28640200  | 2.51615800  |
| H | -2.15691000 | 1.96439400  | 2.45280900  |
| H | -2.12747700 | 1.09309700  | 3.98676300  |
| C | -3.81956700 | -0.84223200 | 3.59335500  |
| H | -3.39743300 | -0.64037900 | 4.59001400  |
| H | -4.84566900 | -1.20396400 | 3.74558500  |
| H | -3.24101900 | -1.65709800 | 3.13278200  |
| C | -2.43457100 | 1.40461800  | -2.74365000 |
| H | -2.63374100 | 2.39261800  | -2.31085400 |
| H | -1.51610200 | 1.00185700  | -2.30382100 |
| H | -2.23718100 | 1.55286700  | -3.81698600 |
| C | -4.77190900 | 1.09725300  | -3.44806500 |
| H | -4.41035200 | 1.31890200  | -4.46452400 |
| H | -5.65758300 | 0.45453800  | -3.54557900 |
| H | -5.08948800 | 2.04551700  | -2.98592700 |
| C | -3.21145600 | -0.89030900 | -3.27132100 |
| H | -4.04030700 | -1.61183200 | -3.32023200 |
| H | -2.85519000 | -0.71321600 | -4.29909300 |
| H | -2.39103800 | -1.35408600 | -2.70173200 |

---

BNPA-2

---

|   |            |            |            |
|---|------------|------------|------------|
| C | 0.00000200 | 1.47030900 | 0.00000100 |
| C | 1.22054300 | 0.79720600 | 0.03506700 |

|   |             |             |             |
|---|-------------|-------------|-------------|
| C | -1.22054100 | 0.79720900  | -0.03506600 |
| C | 1.22256300  | -0.60600000 | 0.02427100  |
| H | 2.14531200  | 1.36270100  | 0.09040200  |
| N | 0.00000400  | 2.88786800  | 0.00000000  |
| C | -1.22256600 | -0.60599600 | -0.02426900 |
| H | -2.14530900 | 1.36270600  | -0.09040100 |
| N | 2.44001500  | -1.29055000 | 0.05923300  |
| C | -0.00000200 | -1.33345800 | 0.00000100  |
| C | -0.70396500 | 3.70161400  | 0.89084100  |
| C | 0.70397700  | 3.70161000  | -0.89084200 |
| N | -2.44001800 | -1.29054300 | -0.05923200 |
| C | 2.53635600  | -2.68551700 | 0.20306400  |
| C | 3.65110500  | -0.51212300 | 0.04245800  |
| B | -0.00000400 | -2.84677600 | 0.00000100  |
| C | -1.51216600 | 3.33545600  | 1.97160200  |
| C | -0.44806000 | 5.06288400  | 0.57076100  |
| C | 1.51217600  | 3.33544700  | -1.97160300 |
| C | 0.44807600  | 5.06288100  | -0.57076600 |
| C | -2.53636300 | -2.68551000 | -0.20306300 |
| C | -3.65110700 | -0.51211300 | -0.04245800 |
| C | 3.81981000  | -3.27143800 | 0.29942400  |
| C | 1.37385900  | -3.50716100 | 0.24819000  |
| C | 4.08106200  | 0.09892900  | -1.16470400 |
| C | 4.39125800  | -0.37358400 | 1.24650500  |
| C | -1.37386900 | -3.50715700 | -0.24818800 |
| C | -2.08031100 | 4.36156800  | 2.72696500  |
| H | -1.69095100 | 2.28638600  | 2.20310600  |
| C | -1.03448300 | 6.07247600  | 1.34562600  |
| C | 2.08032600  | 4.36155500  | -2.72696700 |
| H | 1.69095700  | 2.28637600  | -2.20310500 |
| C | 1.03450300  | 6.07246900  | -1.34563200 |
| C | -3.81981900 | -3.27142700 | -0.29942300 |
| C | -4.08106200 | 0.09894100  | 1.16470300  |
| C | -4.39125800 | -0.37357400 | -1.24650500 |
| C | 3.95800000  | -4.63298200 | 0.52204000  |
| H | 4.70605100  | -2.64898500 | 0.20659300  |
| C | 1.56995500  | -4.88206200 | 0.52484400  |
| C | 5.27502300  | 0.85066600  | -1.13745200 |
| C | 5.59279200  | 0.36064400  | 1.21861100  |
| C | -1.56996800 | -4.88205800 | -0.52484200 |
| C | -1.85035000 | 5.71611300  | 2.41861400  |
| H | -2.71439000 | 4.10593400  | 3.57876100  |
| H | -0.84928600 | 7.12335400  | 1.11344900  |
| C | 1.85036900  | 5.71610100  | -2.41861900 |

|   |             |             |             |
|---|-------------|-------------|-------------|
| H | 2.71440400  | 4.10591700  | -3.57876200 |
| H | 0.84931000  | 7.12334900  | -1.11345700 |
| C | -3.95801200 | -4.63297100 | -0.52203800 |
| H | -4.70605800 | -2.64897200 | -0.20659200 |
| C | -5.27502100 | 0.85068100  | 1.13744900  |
| C | -5.59279000 | 0.36065700  | -1.21861300 |
| C | 2.82723800  | -5.44935700 | 0.66983900  |
| H | 4.96055500  | -5.05975800 | 0.60034600  |
| H | 0.69382100  | -5.51614100 | 0.65056700  |
| C | 6.01182400  | 0.96400200  | 0.03750100  |
| C | -2.82725300 | -5.44935000 | -0.66983700 |
| H | -0.69383600 | -5.51614000 | -0.65056400 |
| H | -2.31321200 | 6.49313100  | 3.02978600  |
| H | 2.31323400  | 6.49311700  | -3.02979300 |
| H | -4.96056900 | -5.05974500 | -0.60034400 |
| C | -6.01182100 | 0.96401800  | -0.03750500 |
| H | 2.93496800  | -6.51360000 | 0.88754700  |
| H | 6.93780200  | 1.54333100  | 0.03069800  |
| H | -2.93498500 | -6.51359300 | -0.88754400 |
| H | -6.93779800 | 1.54335000  | -0.03070300 |
| H | -6.17281100 | 0.48747400  | -2.13101600 |
| H | -5.64518300 | 1.32159000  | 2.04462900  |
| H | 6.17281200  | 0.48746100  | 2.13101300  |
| H | 5.64518500  | 1.32157200  | -2.04463200 |
| N | -3.97669900 | -1.01375800 | -2.41503500 |
| N | -3.33041400 | -0.00342400 | 2.34188900  |
| N | 3.97669600  | -1.01376300 | 2.41503600  |
| N | 3.33041200  | -0.00343500 | -2.34188900 |
| C | -4.95793100 | -1.33700500 | -3.42828500 |
| H | -5.20234000 | -0.48759300 | -4.10115900 |
| H | -4.56693100 | -2.15624500 | -4.05180700 |
| H | -5.88856800 | -1.68731200 | -2.95979800 |
| C | -2.60874200 | -0.89526500 | -2.90623400 |
| H | -2.04911300 | -1.84444700 | -2.82576100 |
| H | -2.62763800 | -0.59436300 | -3.96824700 |
| H | -2.05819200 | -0.11959600 | -2.36172200 |
| C | -2.76780900 | -1.29875300 | 2.74010900  |
| H | -1.70068000 | -1.39320300 | 2.48220600  |
| H | -2.86559600 | -1.40540000 | 3.83079200  |
| H | -3.31134200 | -2.13529700 | 2.27900500  |
| C | -3.69520600 | 0.85123900  | 3.45834900  |
| H | -4.61169300 | 0.51859200  | 3.98947800  |
| H | -2.86661100 | 0.86029800  | 4.18118500  |
| H | -3.84994300 | 1.88272600  | 3.11499300  |

|   |            |             |             |
|---|------------|-------------|-------------|
| C | 2.60873900 | -0.89526300 | 2.90623600  |
| H | 2.04910600 | -1.84444300 | 2.82576500  |
| H | 2.62763700 | -0.59435800 | 3.96824800  |
| H | 2.05819300 | -0.11959300 | 2.36172200  |
| C | 4.95792700 | -1.33701000 | 3.42828800  |
| H | 5.20233900 | -0.48759700 | 4.10115900  |
| H | 4.56692400 | -2.15624700 | 4.05181200  |
| H | 5.88856300 | -1.68732200 | 2.95980200  |
| C | 2.76780300 | -1.29876200 | -2.74010700 |
| H | 1.70067400 | -1.39321000 | -2.48220200 |
| H | 2.86558800 | -1.40541100 | -3.83079000 |
| H | 3.31133500 | -2.13530800 | -2.27900300 |
| C | 3.69520500 | 0.85122700  | -3.45835100 |
| H | 4.61169000 | 0.51857700  | -3.98948000 |
| H | 2.86660900 | 0.86028600  | -4.18118500 |
| H | 3.84994500 | 1.88271400  | -3.11499500 |

---

BNPA-3

---

|   |             |             |             |
|---|-------------|-------------|-------------|
| C | -1.47323600 | 0.00000000  | 0.00000000  |
| C | -0.81053800 | -1.22430200 | -0.07762200 |
| C | -0.81053800 | 1.22430200  | 0.07762200  |
| C | 0.58871900  | -1.22574500 | -0.01270200 |
| H | -1.38064600 | -2.13573700 | -0.21082700 |
| N | -2.92087800 | 0.00000000  | 0.00000000  |
| C | 0.58871900  | 1.22574500  | 0.01270200  |
| H | -1.38064600 | 2.13573700  | 0.21082600  |
| N | 1.30024700  | -2.43582100 | 0.00975800  |
| C | 1.34010700  | 0.00000000  | 0.00000000  |
| C | -3.71562200 | 0.06730200  | -1.12283300 |
| C | -3.71562200 | -0.06730200 | 1.12283400  |
| N | 1.30024700  | 2.43582000  | -0.00975800 |
| C | 2.69271000  | -2.48111600 | -0.21672300 |
| C | 0.83632500  | -3.76410500 | 0.10682900  |
| B | 2.87943800  | 0.00000000  | 0.00000000  |
| C | -3.30638100 | 0.14766200  | -2.46237800 |
| C | -5.08846700 | 0.04335800  | -0.73123800 |
| C | -3.30638100 | -0.14766100 | 2.46237800  |
| C | -5.08846700 | -0.04335800 | 0.73123800  |
| C | 2.69271000  | 2.48111600  | 0.21672300  |
| C | 0.83632500  | 3.76410500  | -0.10682900 |
| C | 3.10936700  | -3.81794200 | -0.34941300 |
| C | 3.54551200  | -1.36302200 | -0.24755400 |
| C | -0.41023100 | -4.29669100 | 0.46482200  |
| C | 1.93809200  | -4.64084100 | -0.14670900 |
| C | 3.54551200  | 1.36302200  | 0.24755400  |

|   |             |             |             |
|---|-------------|-------------|-------------|
| C | -4.31152500 | 0.20451400  | -3.42877900 |
| H | -2.24737500 | 0.16453800  | -2.71453600 |
| C | -6.06749600 | 0.10107700  | -1.70745400 |
| C | -4.31152500 | -0.20451400 | 3.42877900  |
| H | -2.24737500 | -0.16453800 | 2.71453500  |
| C | -6.06749600 | -0.10107700 | 1.70745500  |
| C | 3.10936700  | 3.81794200  | 0.34941300  |
| C | -0.41023100 | 4.29669100  | -0.46482200 |
| C | 1.93809200  | 4.64084100  | 0.14670900  |
| C | 4.47201100  | -4.08713900 | -0.58595900 |
| C | 4.90340900  | -1.68102300 | -0.49959100 |
| C | -0.56400100 | -5.68579400 | 0.50055400  |
| H | -1.24560000 | -3.66956300 | 0.76263300  |
| C | 1.75633400  | -6.02795900 | -0.11113100 |
| C | 4.90340900  | 1.68102200  | 0.49959100  |
| C | -5.66558500 | 0.18168400  | -3.06133100 |
| H | -4.04100600 | 0.26760300  | -4.48267000 |
| H | -7.12728500 | 0.08546600  | -1.44994800 |
| C | -5.66558500 | -0.18168400 | 3.06133100  |
| H | -4.04100600 | -0.26760200 | 4.48267000  |
| H | -7.12728500 | -0.08546600 | 1.44994800  |
| C | 4.47201100  | 4.08713900  | 0.58595900  |
| C | -0.56400100 | 5.68579400  | -0.50055400 |
| H | -1.24560000 | 3.66956300  | -0.76263300 |
| C | 1.75633500  | 6.02795900  | 0.11113100  |
| C | 5.34763200  | -3.00369600 | -0.66937900 |
| H | 4.83125500  | -5.11219400 | -0.69315600 |
| H | 5.62971700  | -0.87129200 | -0.57611100 |
| C | 0.50111100  | -6.54894300 | 0.19847700  |
| H | -1.53363300 | -6.10131600 | 0.78290900  |
| H | 2.60077000  | -6.69098400 | -0.31079600 |
| C | 5.34763200  | 3.00369600  | 0.66937900  |
| H | 5.62971700  | 0.87129100  | 0.57611200  |
| H | -6.43024100 | 0.22737400  | -3.83768100 |
| H | -6.43024100 | -0.22737400 | 3.83768100  |
| H | 4.83125500  | 5.11219300  | 0.69315600  |
| C | 0.50111100  | 6.54894300  | -0.19847700 |
| H | -1.53363200 | 6.10131600  | -0.78290900 |
| H | 2.60077000  | 6.69098400  | 0.31079600  |
| H | 6.40816800  | -3.18674500 | -0.85929700 |
| H | 0.34975300  | -7.62974800 | 0.22910500  |
| H | 6.40816800  | 3.18674400  | 0.85929700  |
| H | 0.34975300  | 7.62974800  | -0.22910500 |

**Table S3.** Coordinates for <sup>3</sup>R\*

| Atoms | X/Angstrom | Y/Angstrom | Z/Angstrom |
|-------|------------|------------|------------|
| C     | 1.274077   | -0.000001  | 0.000000   |
| C     | 0.566279   | -1.196328  | -0.190727  |
| C     | 0.566282   | 1.196327   | 0.190726   |
| C     | -0.843614  | -1.198541  | -0.140940  |
| H     | 1.123158   | -2.111450  | -0.372910  |
| N     | 2.687996   | -0.000003  | -0.000001  |
| C     | -0.843611  | 1.198542   | 0.140940   |
| H     | 1.123162   | 2.111447   | 0.372909   |
| N     | -1.526555  | -2.414196  | -0.261436  |
| C     | -1.592610  | 0.000001   | 0.000000   |
| C     | 3.505154   | 0.840010   | -0.764419  |
| C     | 3.505153   | -0.840016  | 0.764417   |
| N     | -1.526550  | 2.414199   | 0.261436   |
| C     | -2.924782  | -2.557094  | -0.145606  |
| C     | -0.730303  | -3.605489  | -0.407641  |
| B     | -3.101104  | 0.000003   | 0.000000   |
| C     | 3.147687   | 1.824357   | -1.692620  |
| C     | 4.866588   | 0.538455   | -0.485668  |
| C     | 3.147684   | -1.824363  | 1.692619   |
| C     | 4.866587   | -0.538463  | 0.485668   |
| C     | -2.924776  | 2.557099   | 0.145606   |
| C     | -0.730296  | 3.605490   | 0.407642   |
| C     | -3.467893  | -3.856801  | -0.178369  |
| C     | -3.759633  | -1.397736  | 0.018850   |
| C     | -0.436610  | -4.086940  | -1.684122  |
| C     | -0.238450  | -4.249928  | 0.729891   |
| C     | -3.759630  | 1.397743   | -0.018850  |
| C     | 4.176646   | 2.518989   | -2.329278  |
| H     | 2.102618   | 2.039293   | -1.914910  |
| C     | 5.879710   | 1.251565   | -1.139182  |
| C     | 4.176643   | -2.518996  | 2.329277   |
| H     | 2.102615   | -2.039298  | 1.914908   |
| C     | 5.879709   | -1.251573  | 1.139182   |
| C     | -3.467884  | 3.856807   | 0.178369   |
| C     | -0.436601  | 4.086939   | 1.684122   |
| C     | -0.238442  | 4.249928   | -0.729891  |
| C     | -4.840022  | -4.054435  | -0.013505  |
| H     | -2.819321  | -4.718094  | -0.322196  |
| C     | -5.133838  | -1.664428  | 0.224190   |
| C     | 0.362727   | -5.224548  | -1.822583  |
| H     | -0.833224  | -3.563938  | -2.555230  |
| C     | 0.562146   | -5.384793  | 0.585827   |

|   |           |           |           |
|---|-----------|-----------|-----------|
| H | -0.485899 | -3.853190 | 1.715456  |
| C | -5.133834 | 1.664439  | -0.224191 |
| C | 5.529391  | 2.242189  | -2.055626 |
| H | 3.923637  | 3.292546  | -3.057413 |
| H | 6.929211  | 1.029849  | -0.934329 |
| C | 5.529388  | -2.242197 | 2.055626  |
| H | 3.923633  | -3.292553 | 3.057413  |
| H | 6.929210  | -1.029859 | 0.934329  |
| C | -4.840013 | 4.054445  | 0.013505  |
| H | -2.819311 | 4.718098  | 0.322196  |
| C | 0.362738  | 5.224545  | 1.822583  |
| H | -0.833216 | 3.563938  | 2.555230  |
| C | 0.562157  | 5.384791  | -0.585826 |
| H | -0.485892 | 3.853191  | -1.715456 |
| C | -5.671006 | -2.952320 | 0.206701  |
| H | -5.247356 | -5.066331 | -0.042683 |
| H | -5.802120 | -0.830533 | 0.429001  |
| C | 0.863793  | -5.872203 | -0.689625 |
| H | 0.598167  | -5.602429 | -2.819212 |
| H | 0.953788  | -5.887575 | 1.471958  |
| C | -5.670999 | 2.952331  | -0.206701 |
| H | -5.802117 | 0.830545  | -0.429001 |
| H | 6.309205  | 2.806785  | -2.569984 |
| H | 6.309202  | -2.806794 | 2.569984  |
| H | -5.247344 | 5.066341  | 0.042684  |
| C | 0.863806  | 5.872200  | 0.689626  |
| H | 0.598179  | 5.602425  | 2.819213  |
| H | 0.953800  | 5.887572  | -1.471957 |
| H | -6.742365 | -3.095800 | 0.365472  |
| H | 1.492610  | -6.757554 | -0.800591 |
| H | -6.742358 | 3.095814  | -0.365473 |
| H | 1.492624  | 6.757549  | 0.800592  |

114

115

**Table S4.** Coordinates for  ${}^3\text{TS}_{1-1}$ \*

| Atoms | X/Angstrom | Y/Angstrom | Z/Angstrom |
|-------|------------|------------|------------|
| C     | -0.400085  | -1.594680  | -1.176629  |
| C     | 0.922352   | -1.797726  | -0.795707  |
| C     | -0.954631  | -0.309221  | -1.301444  |
| C     | 1.735562   | -0.665613  | -0.575908  |
| H     | 1.304326   | -2.805012  | -0.641004  |
| N     | -1.706796  | -2.337686  | 0.094635   |
| C     | -0.203193  | 0.796230   | -0.837850  |
| H     | -1.968311  | -0.182139  | -1.675581  |
| N     | 3.090951   | -0.816283  | -0.304000  |

---

|   |           |           |           |
|---|-----------|-----------|-----------|
| C | 1.177948  | 0.656906  | -0.545675 |
| C | -1.828578 | -1.726068 | 1.341353  |
| C | -2.992293 | -2.548871 | -0.365378 |
| N | -0.822920 | 2.033905  | -0.705347 |
| C | 3.999691  | 0.252405  | -0.156125 |
| C | 3.606926  | -2.158294 | -0.231521 |
| B | 2.019356  | 1.860111  | -0.216584 |
| C | -0.806211 | -1.246406 | 2.169083  |
| C | -3.202807 | -1.571167 | 1.704742  |
| C | -3.376760 | -3.081975 | -1.603970 |
| C | -3.967153 | -2.112716 | 0.587881  |
| C | -0.168263 | 3.188271  | -0.251104 |
| C | -2.261361 | 2.043072  | -0.810428 |
| C | 5.376079  | -0.042469 | -0.040363 |
| C | 3.547548  | 1.603235  | -0.148249 |
| C | 3.678734  | -2.799239 | 1.006469  |
| C | 4.020893  | -2.809332 | -1.395372 |
| C | 1.232922  | 3.173655  | 0.020299  |
| C | -1.168662 | -0.604106 | 3.356704  |
| H | 0.237580  | -1.359731 | 1.877315  |
| C | -3.543291 | -0.948284 | 2.904803  |
| C | -4.742036 | -3.182887 | -1.878711 |
| H | -2.617627 | -3.397557 | -2.320797 |
| C | -5.324099 | -2.230929 | 0.297992  |
| C | -0.932894 | 4.357902  | -0.031851 |
| C | -2.880036 | 2.482406  | -1.981334 |
| C | -3.014531 | 1.552447  | 0.259345  |
| C | 6.310555  | 0.983214  | 0.027674  |
| H | 5.716276  | -1.075448 | -0.021622 |
| C | 4.542174  | 2.604966  | -0.118473 |
| C | 4.171956  | -4.104142 | 1.080646  |
| H | 3.346816  | -2.269012 | 1.900281  |
| C | 4.513589  | -4.113621 | -1.317074 |
| H | 3.949360  | -2.287982 | -2.350676 |
| C | 1.781807  | 4.356779  | 0.567330  |
| C | -2.517447 | -0.460012 | 3.726091  |
| H | -0.388796 | -0.209296 | 4.010992  |
| H | -4.589414 | -0.829800 | 3.197270  |
| C | -5.704531 | -2.767390 | -0.941048 |
| H | -5.069644 | -3.592372 | -2.836427 |
| H | -6.081840 | -1.907161 | 1.015316  |
| C | -0.333382 | 5.500909  | 0.473684  |
| H | -1.999955 | 4.359459  | -0.243197 |
| C | -4.273007 | 2.427756  | -2.082308 |

---



|   |           |           |           |
|---|-----------|-----------|-----------|
| H | -2.266971 | 2.851237  | -2.804883 |
| C | -4.403857 | 1.490693  | 0.147388  |
| H | -2.507423 | 1.199703  | 1.157225  |
| C | 5.900440  | 2.319945  | -0.033245 |
| H | 7.370553  | 0.733243  | 0.110019  |
| H | 4.234988  | 3.647132  | -0.191447 |
| C | 4.589597  | -4.761682 | -0.080163 |
| H | 4.227404  | -4.608619 | 2.047124  |
| H | 4.837179  | -4.626013 | -2.225085 |
| C | 1.032563  | 5.503641  | 0.792014  |
| H | 2.831699  | 4.359057  | 0.854699  |
| H | -2.767707 | 0.037414  | 4.665155  |
| H | -6.764942 | -2.863507 | -1.182942 |
| H | -0.940556 | 6.393301  | 0.640185  |
| C | -5.034252 | 1.928053  | -1.021187 |
| H | -4.762907 | 2.764134  | -2.998065 |
| H | -4.989614 | 1.085246  | 0.973395  |
| H | 6.635138  | 3.127049  | -0.015167 |
| H | 4.973448  | -5.782030 | -0.021310 |
| H | 1.498542  | 6.393197  | 1.219986  |
| H | -6.120888 | 1.871484  | -1.109140 |

116

117

**Table S4.** Coordinates for MECP

| Atoms | X/Angstrom | Y/Angstrom | Z/Angstrom |
|-------|------------|------------|------------|
| C     | 0.232495   | -2.174402  | -1.376006  |
| C     | -1.108052  | -1.716059  | -1.096151  |
| C     | 1.121198   | -1.063745  | -1.240993  |
| C     | -1.574294  | -0.404835  | -0.878771  |
| H     | -1.880434  | -2.502400  | -1.175505  |
| N     | 0.301932   | -2.904713  | 0.843220   |
| C     | 0.788580   | 0.275480   | -1.017089  |
| H     | 2.210777   | -1.280299  | -1.352836  |
| N     | -2.937272  | -0.142249  | -0.583081  |
| C     | -0.591704  | 0.582801   | -0.682591  |
| C     | 1.773057   | -3.196839  | 0.861793   |
| C     | 0.256352   | -1.737696  | 1.654269   |
| N     | 1.739735   | 1.304921   | -0.867627  |
| C     | -3.358712  | 1.006056   | 0.071960   |
| C     | -3.899363  | -1.151306  | -0.937832  |
| B     | -0.992147  | 1.969023   | -0.162311  |
| C     | 2.333867   | -4.305419  | 0.277404   |
| C     | 2.478093   | -2.238705  | 1.566556   |
| C     | -0.920844  | -1.087447  | 2.102323   |
| C     | 1.536711   | -1.268112  | 2.093606   |

---

|   |           |           |           |
|---|-----------|-----------|-----------|
| C | 1.436211  | 2.646717  | -0.563461 |
| C | 3.113487  | 0.969255  | -1.136084 |
| C | -4.717332 | 1.112851  | 0.474624  |
| C | -2.435749 | 2.066703  | 0.364531  |
| C | -4.424556 | -1.166845 | -2.229098 |
| C | -4.293359 | -2.117304 | -0.003193 |
| C | 0.106899  | 3.050975  | -0.241318 |
| C | 3.699322  | -4.392099 | 0.274741  |
| H | 1.692834  | -5.001481 | -0.292418 |
| C | 3.908403  | -2.350738 | 1.595054  |
| C | -0.823022 | 0.070931  | 2.857307  |
| H | -1.890409 | -1.508407 | 1.825776  |
| C | 1.622904  | -0.088182 | 2.852407  |
| C | 2.473562  | 3.608099  | -0.598683 |
| C | 3.988450  | 0.660304  | -0.094765 |
| C | 3.560277  | 0.944452  | -2.459547 |
| C | -5.144054 | 2.193881  | 1.219378  |
| H | -5.418634 | 0.323643  | 0.213641  |
| C | -2.927968 | 3.130272  | 1.168870  |
| C | -5.357887 | -2.143552 | -2.587331 |
| H | -4.092351 | -0.412745 | -2.943513 |
| C | -5.223175 | -3.093002 | -0.364059 |
| H | -3.866649 | -2.103098 | 1.000252  |
| C | -0.120469 | 4.435613  | -0.060813 |
| C | 4.490816  | -3.397476 | 0.929162  |
| H | 4.206420  | -5.195900 | -0.274084 |
| H | 4.505604  | -1.593094 | 2.109473  |
| C | 0.445420  | 0.584891  | 3.195313  |
| H | -1.719042 | 0.628090  | 3.126867  |
| H | 2.592273  | 0.320059  | 3.137876  |
| C | 2.198927  | 4.953392  | -0.379060 |
| H | 3.492842  | 3.305205  | -0.828351 |
| C | 5.316110  | 0.326829  | -0.374101 |
| H | 3.617882  | 0.680431  | 0.929927  |
| C | 4.886888  | 0.608471  | -2.737697 |
| H | 2.857099  | 1.180150  | -3.258695 |
| C | -4.240529 | 3.206395  | 1.600518  |
| H | -6.191212 | 2.247388  | 1.523435  |
| H | -2.227867 | 3.907293  | 1.473005  |
| C | -5.759229 | -3.105396 | -1.656147 |
| H | -5.770408 | -2.150067 | -3.597882 |
| H | -5.526002 | -3.846600 | 0.365443  |
| C | 0.892314  | 5.385214  | -0.123120 |
| H | -1.142920 | 4.772946  | 0.106182  |

---

|   |           |           |           |
|---|-----------|-----------|-----------|
| H | 5.576086  | -3.480769 | 0.879839  |
| H | 0.502053  | 1.544679  | 3.718638  |
| H | 3.018967  | 5.674448  | -0.430336 |
| C | 5.767082  | 0.298901  | -1.695965 |
| H | 5.998673  | 0.080931  | 0.442689  |
| H | 5.232010  | 0.588479  | -3.772845 |
| H | -4.575541 | 4.041954  | 2.218001  |
| H | -6.488706 | -3.867555 | -1.936333 |
| H | 0.669827  | 6.444531  | 0.014848  |
| H | 6.804024  | 0.035434  | -1.914773 |

118

119

**Table S5.** Coordinates for <sup>1</sup>IM<sub>1-1</sub>

| Atoms | X/Angstrom | Y/Angstrom | Z/Angstrom |
|-------|------------|------------|------------|
| C     | 0.948800   | -3.293968  | 0.174409   |
| C     | 2.008969   | -2.457278  | 0.232393   |
| C     | -0.322103  | -3.013744  | -0.190020  |
| C     | 1.801522   | -1.155106  | -0.369957  |
| H     | 2.892231   | -2.633712  | 0.847159   |
| N     | -2.489979  | 0.356755   | 2.000779   |
| C     | -0.611298  | -1.609529  | -0.421076  |
| H     | -1.030816  | -3.770969  | -0.526855  |
| N     | 2.879157   | -0.315827  | -0.573282  |
| C     | 0.481663   | -0.705777  | -0.602470  |
| C     | -2.484385  | 1.682651   | 1.619267   |
| C     | -1.195458  | 0.056160   | 2.294048   |
| N     | -1.889891  | -1.206827  | -0.696247  |
| C     | 2.752848   | 1.065209   | -0.822526  |
| C     | 4.193254   | -0.881522  | -0.410735  |
| B     | 0.226454   | 0.729658   | -1.015570  |
| C     | -3.576469  | 2.449323   | 1.184131   |
| C     | -1.170668  | 2.265284   | 1.672374   |
| C     | -0.678530  | -1.195985  | 2.691758   |
| C     | -0.304536  | 1.181576   | 2.112682   |
| C     | -2.218011  | 0.047038   | -1.259413  |
| C     | -2.956078  | -2.176636  | -0.536951  |
| C     | 3.921685   | 1.855470   | -0.894423  |
| C     | 1.468040   | 1.653905   | -0.994189  |
| C     | 4.901602   | -0.679173  | 0.777286   |
| C     | 4.737985   | -1.649503  | -1.441048  |
| C     | -1.219617  | 1.040262   | -1.458617  |
| C     | -3.356204  | 3.777970   | 0.815944   |
| H     | -4.569832  | 2.000958   | 1.132351   |
| C     | -0.971748  | 3.596311   | 1.318015   |
| C     | 0.691415   | -1.314071  | 2.908412   |

---

|   |           |           |           |
|---|-----------|-----------|-----------|
| H | -1.346213 | -2.047269 | 2.830302  |
| C | 1.059386  | 1.038100  | 2.320948  |
| C | -3.559556 | 0.287940  | -1.624720 |
| C | -3.244074 | -3.039406 | -1.598283 |
| C | -3.681987 | -2.221197 | 0.652439  |
| C | 3.825330  | 3.231257  | -1.048710 |
| H | 4.903294  | 1.393497  | -0.817808 |
| C | 1.426332  | 3.061255  | -1.113283 |
| C | 6.165757  | -1.251177 | 0.931900  |
| H | 4.457639  | -0.071808 | 1.565988  |
| C | 6.001958  | -2.222264 | -1.280373 |
| H | 4.164067  | -1.795176 | -2.356963 |
| C | -1.628142 | 2.226052  | -2.110112 |
| C | -2.073582 | 4.349569  | 0.882654  |
| H | -4.194129 | 4.385138  | 0.466246  |
| H | 0.021669  | 4.047145  | 1.368715  |
| C | 1.554708  | -0.222217 | 2.711992  |
| H | 1.107293  | -2.277167 | 3.208860  |
| H | 1.743801  | 1.875364  | 2.167824  |
| C | -3.911263 | 1.482996  | -2.233492 |
| H | -4.323236 | -0.461157 | -1.432186 |
| C | -4.261937 | -3.984293 | -1.456210 |
| H | -2.669793 | -2.965035 | -2.523341 |
| C | -4.700880 | -3.170311 | 0.781926  |
| H | -3.463793 | -1.476383 | 1.423542  |
| C | 2.570191  | 3.848965  | -1.131162 |
| H | 4.738750  | 3.828235  | -1.092154 |
| H | 0.455860  | 3.549470  | -1.159491 |
| C | 6.716451  | -2.023927 | -0.095597 |
| H | 6.720415  | -1.095390 | 1.859073  |
| H | 6.429192  | -2.824568 | -2.084201 |
| C | -2.938736 | 2.454936  | -2.500564 |
| H | -0.880602 | 2.982422  | -2.337387 |
| H | -1.934190 | 5.394135  | 0.595647  |
| H | 2.624272  | -0.349868 | 2.888397  |
| H | -4.953582 | 1.653783  | -2.510232 |
| C | -4.988046 | -4.053423 | -0.262490 |
| H | -4.489515 | -4.664095 | -2.279509 |
| H | -5.278556 | -3.211652 | 1.707523  |
| H | 2.492085  | 4.934339  | -1.216568 |
| H | 7.704060  | -2.472272 | 0.028150  |
| H | -3.210554 | 3.386819  | -2.999099 |
| H | -5.784606 | -4.792111 | -0.151843 |

---

**Table S6.** Coordinates for  ${}^3\text{IM}_{1-1}$ \*

| Atom | X/Angstrom | Y/Angstrom | Z/Angstrom |
|------|------------|------------|------------|
| C    | 0.630510   | -3.349139  | 0.191203   |
| C    | 1.781643   | -2.626027  | -0.006310  |
| C    | -0.669649  | -2.947363  | 0.008843   |
| C    | 1.595004   | -1.288118  | -0.426336  |
| H    | 2.770961   | -3.041548  | 0.171639   |
| N    | -1.797991  | 0.214101   | 2.245799   |
| C    | -0.839305  | -1.620258  | -0.455364  |
| H    | -1.516212  | -3.607302  | 0.184746   |
| N    | 2.704517   | -0.460878  | -0.618982  |
| C    | 0.287441   | -0.773973  | -0.664960  |
| C    | -2.034978  | 1.481462   | 1.762419   |
| C    | -0.442028  | 0.162729   | 2.505458   |
| N    | -2.123061  | -1.135754  | -0.709251  |
| C    | 2.615915   | 0.922763   | -0.836186  |
| C    | 4.007274   | -1.070309  | -0.607319  |
| B    | 0.096875   | 0.652144   | -1.138257  |
| C    | -3.260699  | 1.992726   | 1.308143   |
| C    | -0.845103  | 2.282590   | 1.717586   |
| C    | 0.284778   | -0.944643  | 2.960916   |
| C    | 0.216178   | 1.403287   | 2.211201   |
| C    | -2.386267  | 0.099583   | -1.316797  |
| C    | -3.233631  | -2.006419  | -0.416559  |
| C    | 3.798005   | 1.696360   | -0.781040  |
| C    | 1.359125   | 1.544682   | -1.080254  |
| C    | 4.703989   | -1.238213  | 0.591705   |
| C    | 4.565927   | -1.498239  | -1.813914  |
| C    | -1.333244  | 1.018126   | -1.594268  |
| C    | -3.289465  | 3.299689   | 0.814669   |
| H    | -4.155584  | 1.370323   | 1.326020   |
| C    | -0.892224  | 3.582317   | 1.244263   |
| C    | 1.665883   | -0.799473  | 3.137820   |
| H    | -0.219809  | -1.892584  | 3.148396   |
| C    | 1.583237   | 1.531993   | 2.381079   |
| C    | -3.721301  | 0.424308   | -1.653248  |
| C    | -3.732305  | -2.847835  | -1.414555  |
| C    | -3.788851  | -2.005386  | 0.864841   |
| C    | 3.739362   | 3.077063   | -0.907636  |
| H    | 4.759378   | 1.214514   | -0.615368  |
| C    | 1.354690   | 2.953979   | -1.181535  |
| C    | 5.967027   | -1.834699  | 0.581698   |
| H    | 4.243618   | -0.902146  | 1.519052   |
| C    | 5.829954   | -2.092420  | -1.821250  |

|   |           |           |           |
|---|-----------|-----------|-----------|
| H | 4.002152  | -1.358783 | -2.737331 |
| C | -1.681325 | 2.194708  | -2.295123 |
| C | -2.127874 | 4.084248  | 0.786882  |
| H | -4.224690 | 3.711577  | 0.433065  |
| H | 0.005345  | 4.201245  | 1.204611  |
| C | 2.302149  | 0.418347  | 2.861290  |
| H | 2.255988  | -1.649274 | 3.485155  |
| H | 2.102193  | 2.459623  | 2.133446  |
| C | -4.010904 | 1.609730  | -2.313352 |
| H | -4.528728 | -0.261624 | -1.407524 |
| C | -4.808730 | -3.691203 | -1.130809 |
| H | -3.274017 | -2.830830 | -2.404554 |
| C | -4.864989 | -2.853942 | 1.141059  |
| H | -3.351861 | -1.349766 | 1.621247  |
| C | 2.508417  | 3.722180  | -1.092705 |
| H | 4.663009  | 3.657294  | -0.847579 |
| H | 0.399434  | 3.460305  | -1.302711 |
| C | 6.531895  | -2.261319 | -0.623974 |
| H | 6.511380  | -1.966574 | 1.518927  |
| H | 6.266847  | -2.425927 | -2.764551 |
| C | -2.986161 | 2.499671  | -2.659528 |
| H | -0.886758 | 2.880525  | -2.585093 |
| H | -2.179082 | 5.101818  | 0.394319  |
| H | 3.379064  | 0.511315  | 3.015173  |
| H | -5.048241 | 1.834913  | -2.571541 |
| C | -5.377154 | -3.693480 | 0.147255  |
| H | -5.202850 | -4.348798 | -1.908230 |
| H | -5.303634 | -2.859660 | 2.141127  |
| H | 2.458158  | 4.810101  | -1.169061 |
| H | 7.519446  | -2.726903 | -0.630381 |
| H | -3.209114 | 3.418487  | -3.205002 |
| H | -6.218328 | -4.353831 | 0.368497  |

122

123

**Table S6.** Coordinates for  ${}^3\text{TS}_{1-2}^*$ 

| Atoms | X/Angstrom | Y/Angstrom | Z/Angstrom |
|-------|------------|------------|------------|
| C     | 0.341231   | -3.687735  | 0.718043   |
| C     | 1.492179   | -3.065263  | 0.297393   |
| C     | -0.955255  | -3.242680  | 0.597834   |
| C     | 1.306299   | -1.793362  | -0.306033  |
| H     | 2.479584   | -3.495593  | 0.450803   |
| N     | -0.532776  | 1.243313   | 0.657534   |
| C     | -1.114617  | -1.990342  | -0.046177  |
| H     | -1.807929  | -3.818301  | 0.954337   |
| N     | 2.427337   | -1.028021  | -0.681624  |

---

|   |           |           |           |
|---|-----------|-----------|-----------|
| C | 0.015443  | -1.250007 | -0.461827 |
| C | -1.012719 | 2.542986  | 0.556030  |
| C | 0.460945  | 1.276829  | 1.645389  |
| N | -2.392791 | -1.452385 | -0.265502 |
| C | 2.367360  | 0.271970  | -1.208249 |
| C | 3.723341  | -1.620976 | -0.488961 |
| B | -0.205679 | 0.195994  | -0.976913 |
| C | -2.092992 | 3.012280  | -0.212743 |
| C | -0.291251 | 3.436282  | 1.410773  |
| C | 1.171374  | 0.204452  | 2.200439  |
| C | 0.671140  | 2.604999  | 2.123672  |
| C | -2.635740 | -0.489596 | -1.273653 |
| C | -3.509010 | -2.044256 | 0.410392  |
| C | 3.576592  | 0.922319  | -1.558694 |
| C | 1.120834  | 0.936898  | -1.382442 |
| C | 4.431249  | -1.362095 | 0.687265  |
| C | 4.258499  | -2.453379 | -1.473956 |
| C | -1.561777 | 0.291485  | -1.768784 |
| C | -2.401126 | 4.373702  | -0.154879 |
| H | -2.681557 | 2.335067  | -0.824272 |
| C | -0.614264 | 4.786785  | 1.457971  |
| C | 2.109395  | 0.478669  | 3.203068  |
| H | 0.986413  | -0.817390 | 1.882649  |
| C | 1.614012  | 2.863136  | 3.112236  |
| C | -3.935891 | -0.314766 | -1.785335 |
| C | -4.167338 | -3.156593 | -0.124622 |
| C | -3.932062 | -1.490520 | 1.621224  |
| C | 3.557053  | 2.222392  | -2.038025 |
| H | 4.529311  | 0.411480  | -1.438915 |
| C | 1.157955  | 2.265428  | -1.850853 |
| C | 5.687013  | -1.943047 | 0.876677  |
| H | 3.990514  | -0.702796 | 1.435594  |
| C | 5.514089  | -3.033968 | -1.278550 |
| H | 3.684194  | -2.639752 | -2.382406 |
| C | -1.809405 | 1.102702  | -2.887541 |
| C | -1.669200 | 5.254205  | 0.657164  |
| H | -3.234566 | 4.754964  | -0.747783 |
| H | -0.067255 | 5.472378  | 2.108608  |
| C | 2.343989  | 1.788161  | 3.644375  |
| H | 2.660335  | -0.349336 | 3.654188  |
| H | 1.779507  | 3.879124  | 3.477025  |
| C | -4.152536 | 0.555520  | -2.853158 |
| H | -4.773237 | -0.870192 | -1.365998 |
| C | -5.251676 | -3.714619 | 0.556546  |

---

|   |           |           |           |
|---|-----------|-----------|-----------|
| H | -3.822119 | -3.573413 | -1.072028 |
| C | -5.017353 | -2.050157 | 2.299908  |
| H | -3.399156 | -0.623322 | 2.014179  |
| C | 2.342396  | 2.912419  | -2.178097 |
| H | 4.500139  | 2.709799  | -2.294727 |
| H | 0.217866  | 2.810233  | -1.937540 |
| C | 6.228937  | -2.779637 | -0.104186 |
| H | 6.243727  | -1.742125 | 1.794137  |
| H | 5.934925  | -3.686079 | -2.046319 |
| C | -3.083866 | 1.241511  | -3.438745 |
| H | -0.979613 | 1.663549  | -3.319951 |
| H | -1.935087 | 6.312945  | 0.680869  |
| H | 3.087912  | 1.972477  | 4.421858  |
| H | -5.165447 | 0.674325  | -3.244764 |
| C | -5.677557 | -3.162096 | 1.768697  |
| H | -5.765820 | -4.582996 | 0.139608  |
| H | -5.347666 | -1.617124 | 3.246242  |
| H | 2.329981  | 3.943101  | -2.537473 |
| H | 7.210168  | -3.234019 | 0.046693  |
| H | -3.247798 | 1.891968  | -4.300223 |
| H | -6.525456 | -3.599506 | 2.299778  |

124

125

**Table S6.** Coordinates for  ${}^3P_{1-1}^*$ 

| Atoms | X/Angstrom | Y/Angstrom | Z/Angstrom |
|-------|------------|------------|------------|
| C     | 1.045118   | -3.164597  | 1.161819   |
| C     | 2.145724   | -2.432525  | 0.806861   |
| C     | -0.269176  | -2.908048  | 0.824318   |
| C     | 1.880909   | -1.236205  | 0.062237   |
| H     | 3.158100   | -2.730970  | 1.071888   |
| N     | -0.630087  | 1.379005   | 0.283625   |
| C     | -0.487979  | -1.752522  | 0.030115   |
| H     | -1.091113  | -3.555723  | 1.127831   |
| N     | 2.947937   | -0.416898  | -0.324569  |
| C     | 0.563702   | -0.860998  | -0.244901  |
| C     | -1.931028  | 1.890953   | 0.248502   |
| C     | -0.210837  | 1.428749   | 1.612269   |
| N     | -1.739197  | -1.483260  | -0.541874  |
| C     | 2.800509   | 0.825789   | -0.977890  |
| C     | 4.280222   | -0.851566  | 0.007983   |
| B     | 0.178294   | 0.576044   | -0.835325  |
| C     | -2.789193  | 2.129537   | -0.840900  |
| C     | -2.371168  | 2.202111   | 1.572969   |
| C     | 1.032177   | 1.088241   | 2.170385   |
| C     | -1.259828  | 1.905867   | 2.451540   |



---

|   |           |           |           |
|---|-----------|-----------|-----------|
| C | -1.804324 | -0.760274 | -1.756341 |
| C | -2.931983 | -2.073823 | -0.010945 |
| C | 3.966948  | 1.535718  | -1.356350 |
| C | 1.510930  | 1.377915  | -1.199824 |
| C | 4.878093  | -0.400079 | 1.186778  |
| C | 4.955574  | -1.722930 | -0.848314 |
| C | -0.791556 | 0.186059  | -2.056733 |
| C | -4.068767 | 2.620930  | -0.586221 |
| H | -2.478549 | 1.940556  | -1.863480 |
| C | -3.661251 | 2.688571  | 1.805810  |
| C | 1.195111  | 1.194019  | 3.552126  |
| H | 1.864825  | 0.777416  | 1.549686  |
| C | -1.077842 | 2.005225  | 3.832675  |
| C | -2.860379 | -0.992868 | -2.655915 |
| C | -3.273807 | -3.398953 | -0.302710 |
| C | -3.766816 | -1.287016 | 0.789350  |
| C | 3.857463  | 2.800083  | -1.914546 |
| H | 4.952398  | 1.102244  | -1.199520 |
| C | 1.455438  | 2.679244  | -1.725921 |
| C | 6.167103  | -0.828450 | 1.510673  |
| H | 4.330659  | 0.283819  | 1.836690  |
| C | 6.244702  | -2.148700 | -0.518739 |
| H | 4.464215  | -2.059439 | -1.762122 |
| C | -0.786036 | 0.745097  | -3.343082 |
| C | -4.515256 | 2.888305  | 0.720621  |
| H | -4.738708 | 2.798833  | -1.430019 |
| H | -3.990042 | 2.911562  | 2.823339  |
| C | 0.153688  | 1.640184  | 4.383064  |
| H | 2.158595  | 0.929248  | 3.993696  |
| H | -1.887161 | 2.364600  | 4.472249  |
| C | -2.861301 | -0.358738 | -3.895189 |
| H | -3.663652 | -1.680398 | -2.393959 |
| C | -4.449248 | -3.943117 | 0.221715  |
| H | -2.619645 | -3.989903 | -0.945899 |
| C | -4.943178 | -1.834537 | 1.304723  |
| H | -3.488359 | -0.252982 | 0.993519  |
| C | 2.595717  | 3.389341  | -2.091929 |
| H | 4.762677  | 3.337710  | -2.203694 |
| H | 0.472341  | 3.139173  | -1.850740 |
| C | 6.850639  | -1.702408 | 0.659425  |
| H | 6.637539  | -0.479472 | 2.431678  |
| H | 6.776208  | -2.830957 | -1.184703 |
| C | -1.806869 | 0.490290  | -4.259298 |
| H | 0.011429  | 1.442354  | -3.607781 |

---

|   |           |           |           |
|---|-----------|-----------|-----------|
| H | -5.527103 | 3.264855  | 0.882750  |
| H | 0.312260  | 1.711928  | 5.460723  |
| H | -3.679510 | -0.549812 | -4.592997 |
| C | -5.284372 | -3.161610 | 1.025623  |
| H | -4.715796 | -4.977614 | -0.004085 |
| H | -5.594337 | -1.218561 | 1.927945  |
| H | 2.511845  | 4.391287  | -2.517816 |
| H | 7.857832  | -2.036652 | 0.915414  |
| H | -1.800181 | 0.968261  | -5.241250 |
| H | -6.204229 | -3.587121 | 1.432037  |

126

127

**Table S7.** Coordinates for  ${}^1P_{1-1}$ 

| Atoms | X/Angstrom | Y/Angstrom | Z/Angstrom |
|-------|------------|------------|------------|
| C     | 0.836708   | -3.169663  | -0.614026  |
| C     | 1.965621   | -2.494890  | -0.802613  |
| C     | -0.413054  | -2.739699  | -0.408540  |
| C     | 1.783034   | -1.019258  | -0.610596  |
| H     | 2.835146   | -2.842646  | -1.362673  |
| N     | -0.514310  | 1.195198   | 1.016571   |
| C     | -0.608526  | -1.348000  | -0.846406  |
| H     | -1.143069  | -3.198140  | 0.264068   |
| N     | 2.878026   | -0.212835  | -0.633690  |
| C     | 0.487787   | -0.487423  | -0.678251  |
| C     | -1.865116  | 1.421151   | 1.313948   |
| C     | 0.024498   | 0.529447   | 2.121991   |
| N     | -1.829122  | -0.845846  | -1.185659  |
| C     | 2.804796   | 1.223647   | -0.637339  |
| C     | 4.168924   | -0.841023  | -0.500063  |
| B     | 0.168659   | 1.069686   | -0.422593  |
| C     | -2.841260  | 2.155194   | 0.614849   |
| C     | -2.205854  | 0.818883   | 2.565119   |
| C     | 1.353876   | 0.155870   | 2.372671   |
| C     | -0.985376  | 0.245842   | 3.085823   |
| C     | -1.929838  | 0.445849   | -1.788170  |
| C     | -2.999825  | -1.670326  | -1.077798  |
| C     | 4.010622   | 1.952140   | -0.679592  |
| C     | 1.558006   | 1.874397   | -0.479899  |
| C     | 4.562432   | -1.340016  | 0.742955   |
| C     | 4.995168   | -0.970389  | -1.619267  |
| C     | -0.910134  | 1.402046   | -1.574574  |
| C     | -4.135849  | 2.210433   | 1.130333   |
| H     | -2.605802  | 2.682901   | -0.304516  |
| C     | -3.513689  | 0.884318   | 3.063352   |
| C     | 1.645841   | -0.525338  | 3.554429   |

|   |           |           |           |
|---|-----------|-----------|-----------|
| H | 2.151988  | 0.436571  | 1.692465  |
| C | -0.673138 | -0.443001 | 4.264744  |
| C | -3.018436 | 0.702851  | -2.637013 |
| C | -3.164875 | -2.782193 | -1.908181 |
| C | -3.961644 | -1.336934 | -0.118941 |
| C | 3.990088  | 3.337804  | -0.559617 |
| H | 4.965823  | 1.442021  | -0.780872 |
| C | 1.593782  | 3.269240  | -0.318108 |
| C | 5.804391  | -1.966747 | 0.866974  |
| H | 3.889795  | -1.244742 | 1.595138  |
| C | 6.236130  | -1.597228 | -1.487373 |
| H | 4.659128  | -0.579622 | -2.580798 |
| C | -0.974484 | 2.574154  | -2.341972 |
| C | -4.484406 | 1.569000  | 2.334500  |
| H | -4.894530 | 2.773415  | 0.582090  |
| H | -3.761763 | 0.412060  | 4.016831  |
| C | 0.644073  | -0.838687 | 4.491674  |
| H | 2.681815  | -0.803001 | 3.766107  |
| H | -1.452521 | -0.659173 | 4.999349  |
| C | -3.076154 | 1.908037  | -3.331527 |
| H | -3.801899 | -0.042447 | -2.768454 |
| C | -4.306692 | -3.575852 | -1.771365 |
| H | -2.403848 | -3.013528 | -2.654390 |
| C | -5.101364 | -2.132867 | 0.004857  |
| H | -3.810587 | -0.465660 | 0.516972  |
| C | 2.776689  | 4.005395  | -0.366398 |
| H | 4.929843  | 3.892261  | -0.594623 |
| H | 0.650070  | 3.785404  | -0.128053 |
| C | 6.642286  | -2.093422 | -0.244553 |
| H | 6.115916  | -2.359184 | 1.836596  |
| H | 6.884818  | -1.701640 | -2.358982 |
| C | -2.040311 | 2.840127  | -3.203491 |
| H | -0.182108 | 3.315989  | -2.231431 |
| H | -5.508527 | 1.632135  | 2.707859  |
| H | 0.905458  | -1.372677 | 5.407309  |
| H | -3.921428 | 2.106642  | -3.993473 |
| C | -5.275395 | -3.251331 | -0.817211 |
| H | -4.440919 | -4.445945 | -2.416823 |
| H | -5.852267 | -1.876794 | 0.754519  |
| H | 2.757838  | 5.090318  | -0.243058 |
| H | 7.612238  | -2.584041 | -0.143952 |
| H | -2.073997 | 3.777888  | -3.762426 |
| H | -6.168037 | -3.871631 | -0.714380 |

**Table S8.** Coordinates for  ${}^3\text{TS}_{1-2}$ '\*

| Atoms | X/Angstrom | Y/Angstrom | Z/Angstrom |
|-------|------------|------------|------------|
| C     | 0.077238   | -1.836538  | 1.996082   |
| C     | -1.248717  | -1.612097  | 1.735703   |
| C     | 1.161664   | -1.063041  | 1.632010   |
| C     | -1.525877  | -0.515334  | 0.875453   |
| H     | -2.042032  | -2.236576  | 2.141393   |
| N     | 0.736349   | -3.472371  | -1.596371  |
| C     | 0.858282   | 0.063445   | 0.847010   |
| H     | 2.177719   | -1.301133  | 1.938143   |
| N     | -2.852660  | -0.202793  | 0.544182   |
| C     | -0.455302  | 0.233965   | 0.316546   |
| C     | 0.404670   | -2.263561  | -1.993159  |
| C     | 2.088704   | -3.384945  | -1.210815  |
| N     | 1.799592   | 1.071274   | 0.560516   |
| C     | -3.203969  | 0.906366   | -0.242804  |
| C     | -3.901845  | -1.043447  | 1.047606   |
| B     | -0.809059  | 0.930739   | -1.002124  |
| C     | -0.862478  | -1.841226  | -2.530546  |
| C     | 1.515174   | -1.288935  | -1.913088  |
| C     | 2.872315   | -4.406095  | -0.669505  |
| C     | 2.632052   | -2.081504  | -1.411464  |
| C     | 1.300803   | 2.398320   | 0.303238   |
| C     | 3.137340   | 1.072316   | 1.077851   |
| C     | -4.540474  | 1.355827   | -0.283343  |
| C     | -2.222009  | 1.538859   | -1.051433  |
| C     | -4.385543  | -2.083346  | 0.250146   |
| C     | -4.430215  | -0.823624  | 2.322433   |
| C     | 1.102863   | 2.913921   | -0.962820  |
| C     | -1.062152  | -0.525421  | -2.791154  |
| H     | -1.626172  | -2.594261  | -2.734929  |
| C     | 1.317559   | 0.020535   | -2.192943  |
| C     | 4.198204   | -4.116185  | -0.330663  |
| H     | 2.444239   | -5.397753  | -0.514515  |
| C     | 3.956523   | -1.806679  | -1.073877  |
| C     | 0.989310   | 3.257681   | 1.374446   |
| C     | 3.425247   | 0.823029   | 2.427255   |
| C     | 4.177917   | 1.426431   | 0.209594   |
| C     | -4.891310  | 2.427130   | -1.097408  |
| H     | -5.299751  | 0.868363   | 0.326126   |
| C     | -2.621941  | 2.608833   | -1.873118  |
| C     | -5.406929  | -2.905952  | 0.730186   |
| H     | -3.948880  | -2.238641  | -0.737311  |
| C     | -5.451472  | -1.648660  | 2.799924   |

|   |           |           |           |
|---|-----------|-----------|-----------|
| H | -4.032664 | -0.008219 | 2.928516  |
| C | 0.621804  | 4.173591  | -1.258586 |
| C | -0.057576 | 0.530234  | -2.415407 |
| H | -2.015736 | -0.178669 | -3.191030 |
| H | 2.132534  | 0.743843  | -2.142076 |
| C | 4.736372  | -2.833967 | -0.530603 |
| H | 4.827172  | -4.899655 | 0.098400  |
| H | 4.380638  | -0.813058 | -1.217976 |
| C | 0.499394  | 4.541385  | 1.135104  |
| H | 1.128016  | 2.892255  | 2.394020  |
| C | 4.744418  | 0.879061  | 2.882569  |
| H | 2.617287  | 0.588201  | 3.119146  |
| C | 5.492119  | 1.497252  | 0.671806  |
| H | 3.942734  | 1.654115  | -0.830684 |
| C | -3.934292 | 3.067648  | -1.897630 |
| H | -5.929086 | 2.767722  | -1.107515 |
| H | -1.868228 | 3.094076  | -2.497622 |
| C | -5.940754 | -2.689136 | 2.004256  |
| H | -5.783916 | -3.720933 | 0.109338  |
| H | -5.865469 | -1.478908 | 3.795795  |
| C | 0.313302  | 5.006015  | -0.172824 |
| H | 0.482987  | 4.513024  | -2.287251 |
| H | -0.099003 | 1.385832  | -3.106194 |
| H | 5.774138  | -2.634741 | -0.255449 |
| H | 0.253904  | 5.188480  | 1.979135  |
| C | 5.782754  | 1.210504  | 2.008555  |
| H | 4.957919  | 0.673557  | 3.933552  |
| H | 6.292916  | 1.770587  | -0.018200 |
| H | -4.218957 | 3.907143  | -2.534541 |
| H | -6.738174 | -3.333958 | 2.378945  |
| H | -0.072827 | 6.011898  | -0.351952 |
| H | 6.811967  | 1.255037  | 2.369576  |

130

131

**Table S9.** Coordinates for  ${}^3\text{IM}_{1,2}$ '\*

| Atoms | X/Angstrom | Y/Angstrom | Z/Angstrom |
|-------|------------|------------|------------|
| C     | -3.446819  | 2.691254   | 0.697053   |
| C     | -3.879671  | 1.414469   | 0.493709   |
| C     | -2.135937  | 3.122739   | 0.661604   |
| C     | -2.891749  | 0.431269   | 0.191247   |
| H     | -4.933209  | 1.149479   | 0.554565   |
| N     | 4.235533   | -2.392759  | -2.103320  |
| C     | -1.176073  | 2.159294   | 0.335673   |
| H     | -1.828260  | 4.142408   | 0.894771   |
| N     | -3.321712  | -0.882658  | 0.019618   |

---

|   |           |           |           |
|---|-----------|-----------|-----------|
| C | -1.510266 | 0.796768  | 0.046497  |
| C | 3.185200  | -1.636348 | -1.868719 |
| C | 4.831615  | -2.614690 | -0.843036 |
| N | 0.184176  | 2.607838  | 0.358603  |
| C | -2.470662 | -1.950424 | -0.284017 |
| C | -4.724528 | -1.169960 | 0.182242  |
| B | -0.536572 | -0.286947 | -0.464646 |
| C | 2.237821  | -1.125994 | -2.827921 |
| C | 3.005869  | -1.309085 | -0.437678 |
| C | 5.984065  | -3.356819 | -0.575986 |
| C | 4.123856  | -1.976808 | 0.216757  |
| C | 0.525942  | 3.692718  | -0.475671 |
| C | 1.029843  | 2.206664  | 1.419923  |
| C | -2.995686 | -3.263141 | -0.343001 |
| C | -1.095627 | -1.710821 | -0.542811 |
| C | -5.228479 | -1.464239 | 1.450916  |
| C | -5.564096 | -1.160596 | -0.933265 |
| C | 1.416185  | 4.695429  | -0.109169 |
| C | 1.203838  | -0.362254 | -2.399167 |
| H | 2.378688  | -1.366472 | -3.883489 |
| C | 1.976682  | -0.545754 | -0.007600 |
| C | 6.418813  | -3.451132 | 0.750886  |
| H | 6.522708  | -3.843179 | -1.390967 |
| C | 4.566854  | -2.073015 | 1.535296  |
| C | -0.028363 | 3.807933  | -1.769264 |
| C | 2.426990  | 2.331587  | 1.307394  |
| C | 0.490883  | 1.609724  | 2.572108  |
| C | -2.162241 | -4.327501 | -0.647860 |
| H | -4.049631 | -3.445485 | -0.146166 |
| C | -0.288807 | -2.835749 | -0.853819 |
| C | -6.587357 | -1.748700 | 1.603802  |
| H | -4.550953 | -1.467530 | 2.305882  |
| C | -6.922382 | -1.446126 | -0.776040 |
| H | -5.145092 | -0.930776 | -1.913882 |
| C | 1.809314  | 5.748457  | -0.902247 |
| C | 0.977001  | 0.013215  | -0.966516 |
| H | 0.490644  | 0.038023  | -3.125140 |
| H | 1.851899  | -0.324555 | 1.052986  |
| C | 5.723066  | -2.818454 | 1.794916  |
| H | 7.318657  | -4.026435 | 0.980857  |
| H | 4.027047  | -1.576151 | 2.345140  |
| C | 0.314480  | 4.879074  | -2.595430 |
| H | -0.731163 | 3.046553  | -2.113356 |
| C | 3.258820  | 1.865302  | 2.324475  |

---

|   |           |           |           |
|---|-----------|-----------|-----------|
| H | 2.864867  | 2.752268  | 0.403744  |
| C | 1.335214  | 1.133591  | 3.576045  |
| H | -0.588469 | 1.508774  | 2.675311  |
| C | -0.796065 | -4.122093 | -0.904283 |
| H | -2.581575 | -5.335467 | -0.684924 |
| H | 0.768934  | -2.678349 | -1.047994 |
| C | -7.434632 | -1.739612 | 0.491432  |
| H | -6.984841 | -1.978954 | 2.594005  |
| H | -7.581846 | -1.439232 | -1.645854 |
| C | 1.229070  | 5.851779  | -2.179468 |
| H | 2.529229  | 6.491191  | -0.550219 |
| H | 1.061061  | 1.112265  | -0.919921 |
| H | 6.090561  | -2.909892 | 2.819216  |
| H | -0.132463 | 4.944802  | -3.589241 |
| C | 2.723058  | 1.255863  | 3.462436  |
| H | 4.340414  | 1.953970  | 2.207413  |
| H | 0.897177  | 0.666486  | 4.460606  |
| H | -0.144056 | -4.964541 | -1.140104 |
| H | -8.496437 | -1.962331 | 0.612589  |
| H | 1.493932  | 6.683712  | -2.835190 |
| H | 3.378831  | 0.880338  | 4.249633  |

132

133

**Table S10.** Coordinates for  $^3P_{1-2}$ '\*

| Atoms | X/Angstrom | Y/Angstrom | Z/Angstrom |
|-------|------------|------------|------------|
| C     | -3.051026  | 2.783451   | 1.086161   |
| C     | -3.726000  | 1.641801   | 0.765528   |
| C     | -1.689290  | 2.982111   | 0.994722   |
| C     | -2.952219  | 0.552945   | 0.269719   |
| H     | -4.806202  | 1.564273   | 0.869020   |
| N     | 4.841710   | -0.832671  | -1.691937  |
| C     | -0.933414  | 1.916370   | 0.488525   |
| H     | -1.193690  | 3.899990   | 1.311542   |
| N     | -3.628173  | -0.628437  | -0.043132  |
| C     | -1.535891  | 0.681234   | 0.080491   |
| C     | 3.485355   | -0.685135  | -1.556528  |
| C     | 5.204710   | -1.760076  | -0.725470  |
| N     | 0.477165   | 2.126768   | 0.423990   |
| C     | -3.016505  | -1.762354  | -0.583451  |
| C     | -5.047119  | -0.686581  | 0.199349   |
| B     | -0.785546  | -0.501301  | -0.559449  |
| C     | 2.650365   | 0.183059   | -2.283928  |
| C     | 2.934323   | -1.507313  | -0.515149  |
| C     | 6.497181   | -2.224336  | -0.452930  |
| C     | 4.084849   | -2.224225  | 0.039004   |

---

|   |           |           |           |
|---|-----------|-----------|-----------|
| C | 0.908000  | 3.320672  | -0.214512 |
| C | 1.336557  | 1.418048  | 1.298085  |
| C | -3.790375 | -2.917697 | -0.847555 |
| C | -1.627622 | -1.747209 | -0.873702 |
| C | -5.518256 | -1.095476 | 1.448492  |
| C | -5.937788 | -0.342482 | -0.819639 |
| C | 0.384213  | 3.643437  | -1.477657 |
| C | 1.298102  | 0.240448  | -1.947984 |
| H | 3.070736  | 0.805720  | -3.075579 |
| C | 1.588795  | -1.449081 | -0.212087 |
| C | 6.666022  | -3.149097 | 0.586047  |
| H | 7.341356  | -1.861232 | -1.041464 |
| C | 4.264654  | -3.134856 | 1.068036  |
| C | 1.815386  | 4.204192  | 0.392072  |
| C | 2.718515  | 1.360546  | 1.042875  |
| C | 0.822646  | 0.724076  | 2.405138  |
| C | -3.194018 | -4.036337 | -1.408634 |
| H | -4.852875 | -2.935550 | -0.615598 |
| C | -1.071127 | -2.911472 | -1.462156 |
| C | -6.894336 | -1.158006 | 1.680016  |
| H | -4.801698 | -1.359755 | 2.227387  |
| C | -7.313093 | -0.406736 | -0.584297 |
| H | -5.544264 | -0.027890 | -1.787194 |
| C | 0.770184  | 4.816664  | -2.123499 |
| C | 0.743329  | -0.547558 | -0.914956 |
| H | 0.649990  | 0.926179  | -2.495288 |
| H | 1.173995  | -2.059588 | 0.592850  |
| C | 5.569130  | -3.596878 | 1.335453  |
| H | 7.664509  | -3.524728 | 0.818253  |
| H | 3.420851  | -3.483816 | 1.667003  |
| C | 2.208173  | 5.369298  | -0.268283 |
| H | 2.211358  | 3.974549  | 1.380952  |
| C | 3.556425  | 0.616866  | 1.868207  |
| H | 3.127096  | 1.865737  | 0.169907  |
| C | 1.671260  | -0.033735 | 3.216067  |
| H | -0.243977 | 0.766485  | 2.622782  |
| C | -1.825709 | -4.041720 | -1.728207 |
| H | -3.806051 | -4.919322 | -1.606445 |
| H | -0.009128 | -2.903046 | -1.710083 |
| C | -7.792052 | -0.813889 | 0.664746  |
| H | -7.265941 | -1.476552 | 2.655739  |
| H | -8.012047 | -0.137665 | -1.378444 |
| C | 1.691711  | 5.683729  | -1.528206 |
| H | 0.353032  | 5.049952  | -3.105453 |

---



|   |           |           |           |
|---|-----------|-----------|-----------|
| H | -0.339104 | 2.971740  | -1.940438 |
| H | 5.728173  | -4.314929 | 2.142747  |
| H | 2.916506  | 6.044272  | 0.217003  |
| C | 3.041460  | -0.094049 | 2.957124  |
| H | 4.621061  | 0.562976  | 1.633456  |
| H | 1.249178  | -0.574887 | 4.066053  |
| H | -1.367759 | -4.923068 | -2.180493 |
| H | -8.867252 | -0.863069 | 0.847269  |
| H | 2.000510  | 6.597326  | -2.039329 |
| H | 3.701420  | -0.693089 | 3.586495  |

134

135

**Table S11.** Coordinates for  ${}^3\text{TS}_{1-3}$ '\*

| Atoms | X/Angstrom | Y/Angstrom | Z/Angstrom |
|-------|------------|------------|------------|
| C     | -3.150155  | 3.033945   | 0.242298   |
| C     | -3.748444  | 1.809913   | 0.168778   |
| C     | -1.788887  | 3.281039   | 0.241814   |
| C     | -2.894712  | 0.674688   | 0.039466   |
| H     | -4.830157  | 1.695602   | 0.210488   |
| N     | 4.044147   | -2.937622  | -1.754053  |
| C     | -0.963826  | 2.164545   | 0.089205   |
| H     | -1.353692  | 4.269945   | 0.388041   |
| N     | -3.477134  | -0.591436  | 0.022721   |
| C     | -1.478237  | 0.845755   | -0.087316  |
| C     | 2.988868   | -2.153700  | -1.693209  |
| C     | 4.724391   | -2.752899  | -0.529816  |
| N     | 0.450044   | 2.387732   | 0.199617   |
| C     | -2.741801  | -1.780538  | -0.053542  |
| C     | -4.909068  | -0.689537  | 0.140651   |
| B     | -0.651982  | -0.385562  | -0.500723  |
| C     | 1.966398   | -1.974693  | -2.692341  |
| C     | 2.893783   | -1.396229  | -0.428319  |
| C     | 5.909487   | -3.368740  | -0.124901  |
| C     | 4.066767   | -1.822207  | 0.325562   |
| C     | 1.066489   | 3.075679   | -0.879615  |
| C     | 1.085072   | 2.254621   | 1.448161   |
| C     | -3.399477  | -3.021357  | 0.113454   |
| C     | -1.347072  | -1.737151  | -0.316846  |
| C     | -5.502173  | -0.709525  | 1.405206   |
| C     | -5.690585  | -0.771240  | -1.013366  |
| C     | 1.138536   | 2.470997   | -2.125961  |
| C     | 0.937394   | -1.127333  | -2.443396  |
| H     | 2.039211   | -2.535874  | -3.626043  |
| C     | 1.881441   | -0.529306  | -0.192736  |
| C     | 6.426476   | -3.045565  | 1.135904   |

|   |           |           |           |
|---|-----------|-----------|-----------|
| H | 6.410086  | -4.080129 | -0.783787 |
| C | 4.588586  | -1.504920 | 1.578405  |
| C | 1.609105  | 4.368990  | -0.766419 |
| C | 2.488365  | 2.353596  | 1.547764  |
| C | 0.346538  | 1.945097  | 2.605593  |
| C | -2.674502 | -4.201486 | 0.048242  |
| H | -4.470077 | -3.056958 | 0.303230  |
| C | -0.652544 | -2.971610 | -0.375132 |
| C | -6.890999 | -0.809350 | 1.513946  |
| H | -4.869328 | -0.646452 | 2.291559  |
| C | -7.079308 | -0.871853 | -0.900177 |
| H | -5.202994 | -0.756117 | -1.989086 |
| C | 1.693358  | 3.039529  | -3.252181 |
| C | 0.807213  | -0.316803 | -1.195295 |
| H | 0.157710  | -0.987111 | -3.197007 |
| H | 1.832162  | 0.021959  | 0.745550  |
| C | 5.778493  | -2.127219 | 1.977792  |
| H | 7.353140  | -3.516521 | 1.472039  |
| H | 4.083819  | -0.789762 | 2.232525  |
| C | 2.192101  | 4.979889  | -1.879394 |
| H | 1.576969  | 4.877781  | 0.199512  |
| C | 3.124280  | 2.143968  | 2.769860  |
| H | 3.080087  | 2.564065  | 0.657810  |
| C | 1.000241  | 1.729420  | 3.819931  |
| H | -0.737916 | 1.863133  | 2.550946  |
| C | -1.289316 | -4.186580 | -0.188101 |
| H | -3.195356 | -5.151380 | 0.188343  |
| H | 0.420338  | -2.954633 | -0.559218 |
| C | -7.679951 | -0.890437 | 0.362212  |
| H | -7.357749 | -0.824926 | 2.500587  |
| H | -7.693266 | -0.935392 | -1.800487 |
| C | 2.234674  | 4.330022  | -3.118338 |
| H | 1.732341  | 2.509063  | -4.206231 |
| H | 0.884684  | 0.766667  | -1.571608 |
| H | 6.208201  | -1.897051 | 2.954971  |
| H | 2.614283  | 5.981724  | -1.779570 |
| C | 2.389948  | 1.827101  | 3.917466  |
| H | 4.213034  | 2.216161  | 2.817463  |
| H | 0.406018  | 1.484211  | 4.703030  |
| H | -0.725213 | -5.119743 | -0.227751 |
| H | -8.765361 | -0.968679 | 0.448907  |
| H | 2.694052  | 4.818324  | -3.980779 |
| H | 2.893820  | 1.658088  | 4.870346  |

**Table S12.** Coordinates for  ${}^3\text{TS}_{2-1}^*$ 

| Atoms | X/Angstrom | Y/Angstrom | Z/Angstrom |
|-------|------------|------------|------------|
| C     | -1.218222  | 0.006146   | -0.309582  |
| C     | -0.582529  | -1.199024  | -0.586086  |
| C     | -0.469176  | 1.146496   | 0.031070   |
| C     | 0.838910   | -1.275655  | -0.510352  |
| H     | -1.153714  | -2.079744  | -0.869245  |
| N     | -2.627150  | 0.098849   | -0.349665  |
| C     | 0.950554   | 1.090464   | 0.038183   |
| H     | -0.994027  | 2.057601   | 0.300316   |
| N     | 1.404689   | -2.499872  | -0.700962  |
| C     | 1.629448   | -0.116381  | -0.231459  |
| C     | -3.524787  | -0.808251  | 0.237197   |
| C     | -3.362398  | 1.132413   | -0.947321  |
| N     | 1.674030   | 2.238895   | 0.324986   |
| C     | 2.767736   | -2.640999  | -0.887252  |
| C     | 0.586177   | -3.877739  | 0.262885   |
| B     | 3.136448   | -0.186828  | -0.258367  |
| C     | -3.266573  | -1.972097  | 0.968318   |
| C     | -4.849521  | -0.348748  | 0.011574   |
| C     | -2.919902  | 2.238708   | -1.681500  |
| C     | -4.746971  | 0.886184   | -0.742133  |
| C     | 3.075718   | 2.271832   | 0.434689   |
| C     | 0.933826   | 3.459463   | 0.527165   |
| C     | 3.212799   | -3.936818  | -1.255134  |
| C     | 3.697861   | -1.556630  | -0.737146  |
| C     | 0.375202   | -3.600434  | 1.613592   |
| C     | -0.274746  | -4.709373  | -0.452602  |
| C     | 3.858370   | 1.098156   | 0.188492   |
| C     | -4.362858  | -2.682902  | 1.457208   |
| H     | -2.254272  | -2.324773  | 1.157502   |
| C     | -5.932254  | -1.081854  | 0.514201   |
| C     | -3.884141  | 3.111117   | -2.188474  |
| H     | -1.860059  | 2.416093   | -1.860166  |
| C     | -5.693997  | 1.777142   | -1.262128  |
| C     | 3.692973   | 3.489763   | 0.799597   |
| C     | 0.601913   | 4.246901   | -0.577027  |
| C     | 0.525882   | 3.822614   | 1.811949   |
| C     | 4.546565   | -4.164353  | -1.543665  |
| H     | 2.480157   | -4.740416  | -1.318973  |
| C     | 5.040270   | -1.840246  | -1.061909  |
| C     | -0.672335  | -4.244031  | 2.282293   |
| H     | 1.032552   | -2.908740  | 2.149179   |
| C     | -1.322792  | -5.344737  | 0.222263   |

|   |           |           |           |
|---|-----------|-----------|-----------|
| H | -0.127296 | -4.870398 | -1.525127 |
| C | 5.253817  | 1.220280  | 0.406367  |
| C | -5.682575 | -2.249815 | 1.232832  |
| H | -4.180558 | -3.598205 | 2.022743  |
| H | -6.955138 | -0.738549 | 0.346085  |
| C | -5.257368 | 2.890179  | -1.979227 |
| H | -3.560609 | 3.982132  | -2.762118 |
| H | -6.760086 | 1.596494  | -1.110014 |
| C | 5.068342  | 3.556452  | 0.965166  |
| H | 3.090891  | 4.381343  | 0.961146  |
| C | -0.152419 | 5.408024  | -0.392761 |
| H | 0.933173  | 3.939099  | -1.569845 |
| C | -0.225850 | 4.986218  | 1.991238  |
| H | 0.795275  | 3.187618  | 2.657006  |
| C | 5.466189  | -3.104277 | -1.463501 |
| H | 4.879595  | -5.161575 | -1.837855 |
| H | 5.777514  | -1.039760 | -1.015019 |
| C | -1.521132 | -5.118933 | 1.590702  |
| H | -0.827096 | -4.064601 | 3.350191  |
| H | -1.989594 | -6.020096 | -0.320979 |
| C | 5.857872  | 2.409431  | 0.784444  |
| H | 5.876267  | 0.334220  | 0.293333  |
| H | -6.516339 | -2.833608 | 1.627322  |
| H | -5.985157 | 3.593550  | -2.387889 |
| H | 5.528103  | 4.504700  | 1.250539  |
| C | -0.567176 | 5.777504  | 0.890118  |
| H | -0.419486 | 6.023070  | -1.253994 |
| H | -0.550832 | 5.271776  | 2.993340  |
| H | 6.517146  | -3.272714 | -1.708181 |
| H | -2.340687 | -5.615060 | 2.114107  |
| H | 6.937260  | 2.453741  | 0.942189  |
| H | -1.160422 | 6.682705  | 1.032032  |

138

139

**Table S12.** Coordinates for  ${}^3\text{IM}_{2-1}^*$ 

| Atoms | X/Angstrom | Y/Angstrom | Z/Angstrom |
|-------|------------|------------|------------|
| C     | -1.515796  | -0.868868  | -0.608875  |
| C     | -0.818642  | -2.063641  | -0.814045  |
| C     | -0.840834  | 0.349983   | -0.526981  |
| C     | 0.594756   | -2.044893  | -0.892774  |
| H     | -1.336321  | -3.017328  | -0.905102  |
| N     | -2.923971  | -0.883724  | -0.465193  |
| C     | 0.570095   | 0.385914   | -0.664839  |
| H     | -1.409268  | 1.253551   | -0.328293  |
| N     | 1.202653   | -3.253577  | -1.018346  |

---

|   |           |           |           |
|---|-----------|-----------|-----------|
| C | 1.306328  | -0.805367 | -0.827163 |
| C | -3.637493 | -1.673806 | 0.445440  |
| C | -3.825566 | -0.047588 | -1.135966 |
| N | 1.232045  | 1.603103  | -0.573439 |
| C | 2.562999  | -3.336300 | -0.989017 |
| C | 2.200486  | -0.096687 | 2.095220  |
| B | 2.822228  | -0.801378 | -0.848179 |
| C | -3.168257 | -2.613865 | 1.368802  |
| C | -5.017725 | -1.350239 | 0.348242  |
| C | -3.588700 | 0.894578  | -2.142415 |
| C | -5.137927 | -0.315820 | -0.661719 |
| C | 2.621130  | 1.739964  | -0.690220 |
| C | 0.440969  | 2.774699  | -0.291887 |
| C | 3.077647  | -4.662949 | -1.055757 |
| C | 3.465494  | -2.217257 | -0.857468 |
| C | 0.943511  | -0.464545 | 2.530481  |
| C | 2.970255  | 0.919352  | 2.623320  |
| C | 3.466257  | 0.600863  | -0.866840 |
| C | -4.108369 | -3.246135 | 2.183842  |
| H | -2.106990 | -2.847028 | 1.451811  |
| C | -5.940446 | -2.001599 | 1.176522  |
| C | -4.688264 | 1.580189  | -2.660168 |
| H | -2.582184 | 1.085363  | -2.513835 |
| C | -6.224316 | 0.386014  | -1.199371 |
| C | 3.175427  | 3.040775  | -0.625110 |
| C | -0.113545 | 3.505926  | -1.343935 |
| C | 0.213299  | 3.140240  | 1.036071  |
| C | 4.434921  | -4.907932 | -0.950296 |
| H | 2.352380  | -5.469904 | -1.171303 |
| C | 4.831541  | -2.522883 | -0.719670 |
| C | 0.416671  | 0.251868  | 3.618426  |
| H | 0.373218  | -1.261550 | 2.049198  |
| C | 2.425773  | 1.620762  | 3.713956  |
| H | 3.947940  | 1.179140  | 2.212478  |
| C | 4.848570  | 0.857887  | -1.034999 |
| C | -5.480634 | -2.950346 | 2.088590  |
| H | -3.767109 | -3.986215 | 2.910417  |
| H | -7.003946 | -1.762997 | 1.110379  |
| C | -5.993090 | 1.334672  | -2.194279 |
| H | -4.528965 | 2.321440  | -3.445971 |
| H | -7.237663 | 0.188156  | -0.844007 |
| C | 4.540591  | 3.227912  | -0.762281 |
| H | 2.529166  | 3.902032  | -0.471523 |
| C | -0.910070 | 4.618671  | -1.062511 |

---

|   |           |           |           |
|---|-----------|-----------|-----------|
| H | 0.080024  | 3.194210  | -2.371444 |
| C | -0.582319 | 4.255037  | 1.309930  |
| H | 0.652441  | 2.547909  | 1.837690  |
| C | 5.318550  | -3.830663 | -0.763782 |
| H | 4.815992  | -5.930415 | -0.994256 |
| H | 5.547023  | -1.719425 | -0.548604 |
| C | 1.158034  | 1.285303  | 4.204294  |
| H | -0.577175 | 0.002845  | 3.999140  |
| H | 2.994047  | 2.434286  | 4.172479  |
| C | 5.391145  | 2.132297  | -0.983748 |
| H | 5.512163  | 0.018101  | -1.231796 |
| H | -6.188947 | -3.466517 | 2.739107  |
| H | -6.830435 | 1.890216  | -2.620396 |
| H | 4.948253  | 4.239797  | -0.710594 |
| C | -1.144940 | 4.993269  | 0.263994  |
| H | -1.350657 | 5.191287  | -1.880717 |
| H | -0.767352 | 4.542976  | 2.346569  |
| H | 6.389122  | -4.015214 | -0.650664 |
| H | 0.741040  | 1.838188  | 5.048774  |
| H | 6.463650  | 2.283922  | -1.118398 |
| H | -1.770757 | 5.860716  | 0.482500  |

140

141

**Table S13.** Coordinates for  ${}^3\text{TS}_{2-2}^*$ 

| Atoms | X/Angstrom | Y/Angstrom | Z/Angstrom |
|-------|------------|------------|------------|
| C     | -1.668018  | -0.749754  | -0.561987  |
| C     | -0.988250  | -1.944681  | -0.830302  |
| C     | -0.977982  | 0.457823   | -0.444810  |
| C     | 0.423243   | -1.942142  | -0.936334  |
| H     | -1.521682  | -2.887095  | -0.946336  |
| N     | -3.074467  | -0.756047  | -0.402415  |
| C     | 0.427360   | 0.481362   | -0.633518  |
| H     | -1.529034  | 1.360556   | -0.197247  |
| N     | 1.022360   | -3.154348  | -1.096455  |
| C     | 1.141301   | -0.711419  | -0.854955  |
| C     | -3.792062  | -1.592511  | 0.462748   |
| C     | -3.974870  | 0.107084   | -1.040410  |
| N     | 1.115983   | 1.686238   | -0.534109  |
| C     | 2.385488   | -3.245380  | -1.090106  |
| C     | 2.659788   | -0.301570  | 1.570663   |
| B     | 2.662086   | -0.716652  | -0.874860  |
| C     | -3.326696  | -2.577710  | 1.339688   |
| C     | -5.172257  | -1.267154  | 0.373366   |
| C     | -3.736379  | 1.091970   | -2.004722  |
| C     | -5.289058  | -0.185410  | -0.585978  |

---

|   |           |           |           |
|---|-----------|-----------|-----------|
| C | 2.481034  | 1.823400  | -0.821523 |
| C | 0.410190  | 2.818568  | 0.010433  |
| C | 2.896879  | -4.569404 | -1.201224 |
| C | 3.295986  | -2.137280 | -0.942274 |
| C | 1.615571  | -0.880089 | 2.268666  |
| C | 3.531742  | 0.633869  | 2.097353  |
| C | 3.300089  | 0.678448  | -1.065404 |
| C | -4.270677 | -3.253307 | 2.114274  |
| H | -2.265073 | -2.809903 | 1.420323  |
| C | -6.098948 | -1.961341 | 1.161431  |
| C | -4.835243 | 1.796906  | -2.497614 |
| H | -2.729138 | 1.298601  | -2.365562 |
| C | -6.374557 | 0.537502  | -1.096686 |
| C | 3.039909  | 3.122455  | -0.849287 |
| C | -0.297178 | 3.681805  | -0.827611 |
| C | 0.430200  | 3.012347  | 1.393869  |
| C | 4.256759  | -4.818367 | -1.125242 |
| H | 2.170018  | -5.373381 | -1.327841 |
| C | 4.662409  | -2.442623 | -0.834209 |
| C | 1.434207  | -0.484553 | 3.603519  |
| H | 0.946276  | -1.605905 | 1.803712  |
| C | 3.335145  | 1.016403  | 3.434867  |
| H | 4.333314  | 1.072884  | 1.500943  |
| C | 4.650013  | 0.917647  | -1.407970 |
| C | -5.642968 | -2.955342 | 2.025845  |
| H | -3.932585 | -4.029139 | 2.804118  |
| H | -7.162441 | -1.721267 | 1.100930  |
| C | -6.141354 | 1.529496  | -2.047900 |
| H | -4.674419 | 2.570609  | -3.251191 |
| H | -7.389013 | 0.321467  | -0.755369 |
| C | 4.378881  | 3.298444  | -1.158599 |
| H | 2.417953  | 3.989578  | -0.637119 |
| C | -0.997999 | 4.755553  | -0.272083 |
| H | -0.296252 | 3.502776  | -1.903881 |
| C | -0.270293 | 4.089231  | 1.941259  |
| H | 0.989049  | 2.317266  | 2.022216  |
| C | 5.147103  | -3.749914 | -0.923964 |
| H | 4.634111  | -5.840228 | -1.203582 |
| H | 5.375455  | -1.638796 | -0.647036 |
| C | 2.287907  | 0.463040  | 4.179433  |
| H | 0.617419  | -0.915799 | 4.188173  |
| H | 4.001518  | 1.754882  | 3.888552  |
| C | 5.193559  | 2.193031  | -1.458026 |
| H | 5.281629  | 0.063985  | -1.650981 |

---

|   |           |           |           |
|---|-----------|-----------|-----------|
| H | -6.354236 | -3.505656 | 2.644365  |
| H | -6.978093 | 2.101459  | -2.452936 |
| H | 4.792930  | 4.308633  | -1.182741 |
| C | -0.984489 | 4.959241  | 1.110998  |
| H | -1.557955 | 5.431385  | -0.920982 |
| H | -0.261822 | 4.245503  | 3.021592  |
| H | 6.218698  | -3.940821 | -0.833007 |
| H | 2.136466  | 0.771040  | 5.216226  |
| H | 6.241344  | 2.338565  | -1.727476 |
| H | -1.534890 | 5.797112  | 1.543250  |

142

143

**Table S14.** Coordinates for  $^3P_2^*$ 

| Atoms | X/Angstrom | Y/Angstrom | Z/Angstrom |
|-------|------------|------------|------------|
| C     | -1.687710  | -0.665667  | -0.418266  |
| C     | -0.950737  | -1.796326  | -0.822610  |
| C     | -1.049521  | 0.542776   | -0.161245  |
| C     | 0.462125   | -1.750758  | -0.881850  |
| H     | -1.454670  | -2.720683  | -1.103647  |
| N     | -3.093851  | -0.749438  | -0.314959  |
| C     | 0.360899   | 0.616887   | -0.318911  |
| H     | -1.632334  | 1.403971   | 0.150707   |
| N     | 1.103167   | -2.886433  | -1.281234  |
| C     | 1.137754   | -0.536834  | -0.575504  |
| C     | -3.798929  | -1.747470  | 0.373093   |
| C     | -4.016376  | 0.151247   | -0.866999  |
| N     | 1.011001   | 1.836614   | -0.206261  |
| C     | 2.471140   | -2.915433  | -1.357733  |
| C     | 2.811506   | -0.569956  | 1.323709   |
| B     | 2.702413   | -0.506615  | -0.360659  |
| C     | -3.313385  | -2.824289  | 1.121836   |
| C     | -5.190173  | -1.488883  | 0.254790   |
| C     | -3.798149  | 1.280824   | -1.662624  |
| C     | -5.329082  | -0.280132  | -0.535787  |
| C     | 2.349009   | 2.049500   | -0.601911  |
| C     | 0.252973   | 2.962627   | 0.283606   |
| C     | 3.010893   | -4.140585  | -1.844044  |
| C     | 3.349897   | -1.853432  | -0.947245  |
| C     | 2.328579   | -1.704947  | 2.000783   |
| C     | 3.336528   | 0.473451   | 2.105169   |
| C     | 3.218507   | 0.940456   | -0.818674  |
| C     | -4.249004  | -3.663169  | 1.728980   |
| H     | -2.244258  | -3.000310  | 1.237923   |
| C     | -6.107993  | -2.345049  | 0.875395   |
| C     | -4.915972  | 1.988572   | -2.107177  |



---

|   |           |           |           |
|---|-----------|-----------|-----------|
| H | -2.791838 | 1.596054  | -1.935615 |
| C | -6.433639 | 0.448740  | -0.992972 |
| C | 2.785166  | 3.382540  | -0.789389 |
| C | -0.542983 | 3.710342  | -0.585897 |
| C | 0.321017  | 3.261844  | 1.644647  |
| C | 4.378778  | -4.342534 | -1.907790 |
| H | 2.299877  | -4.910556 | -2.148701 |
| C | 4.723676  | -2.122771 | -0.981323 |
| C | 2.372675  | -1.799867 | 3.392864  |
| H | 1.911917  | -2.537056 | 1.428635  |
| C | 3.383542  | 0.385034  | 3.502459  |
| H | 3.738271  | 1.366876  | 1.624017  |
| C | 4.498978  | 1.243389  | -1.302363 |
| C | -5.631372 | -3.433191 | 1.605273  |
| H | -3.895799 | -4.512988 | 2.316223  |
| H | -7.180362 | -2.157487 | 0.791848  |
| C | -6.221135 | 1.584493  | -1.773363 |
| H | -4.770118 | 2.873635  | -2.729826 |
| H | -7.446689 | 0.126145  | -0.744447 |
| C | 4.070233  | 3.626969  | -1.248361 |
| H | 2.113951  | 4.215738  | -0.591642 |
| C | -1.288684 | 4.776891  | -0.079109 |
| H | -0.572513 | 3.451474  | -1.645211 |
| C | -0.426485 | 4.332109  | 2.141962  |
| H | 0.951078  | 2.651678  | 2.293884  |
| C | 5.243837  | -3.330215 | -1.460166 |
| H | 4.781104  | -5.286276 | -2.282096 |
| H | 5.420826  | -1.376825 | -0.593604 |
| C | 2.897317  | -0.750015 | 4.153749  |
| H | 1.991837  | -2.697395 | 3.887061  |
| H | 3.813584  | 1.207048  | 4.081465  |
| C | 4.927784  | 2.551960  | -1.525756 |
| H | 5.183776  | 0.422146  | -1.510446 |
| H | -6.335154 | -4.110068 | 2.092848  |
| H | -7.073310 | 2.162854  | -2.134606 |
| H | 4.401678  | 4.655169  | -1.403476 |
| C | -1.230861 | 5.087283  | 1.283152  |
| H | -1.918195 | 5.363767  | -0.750099 |
| H | -0.383209 | 4.572242  | 3.205725  |
| H | 6.324766  | -3.489534 | -1.474362 |
| H | 2.931532  | -0.820218 | 5.243374  |
| H | 5.933185  | 2.740279  | -1.908608 |
| H | -1.816962 | 5.919728  | 1.676770  |

---

**Table S15.** Coordinates for  ${}^1P_2$ 

| Atoms | X/Angstrom | Y/Angstrom | Z/Angstrom |
|-------|------------|------------|------------|
| C     | -1.690039  | -0.766109  | -0.507600  |
| C     | -0.962121  | -1.861869  | -0.917133  |
| C     | -1.049273  | 0.466375   | -0.200654  |
| C     | 0.463283   | -1.751525  | -0.943722  |
| H     | -1.430947  | -2.800203  | -1.207066  |
| N     | -3.097660  | -0.828298  | -0.382253  |
| C     | 0.334841   | 0.613039   | -0.323728  |
| H     | -1.667391  | 1.295080   | 0.138614   |
| N     | 1.155578   | -2.844039  | -1.322167  |
| C     | 1.122585   | -0.530993  | -0.595725  |
| C     | -3.814649  | -1.787258  | 0.347205   |
| C     | -4.003579  | 0.091909   | -0.924177  |
| N     | 0.985281   | 1.828847   | -0.112577  |
| C     | 2.507798   | -2.883216  | -1.340059  |
| C     | 2.839166   | -0.554388  | 1.308163   |
| B     | 2.670111   | -0.473909  | -0.376121  |
| C     | -3.346273  | -2.874917  | 1.090232   |
| C     | -5.198702  | -1.475243  | 0.274021   |
| C     | -3.766046  | 1.194077   | -1.752453  |
| C     | -5.319488  | -0.277995  | -0.536503  |
| C     | 2.291392   | 2.066617   | -0.636065  |
| C     | 0.223225   | 2.929124   | 0.397926   |
| C     | 3.065270   | -4.126631  | -1.781769  |
| C     | 3.358275   | -1.803242  | -0.898504  |
| C     | 2.304759   | -1.630017  | 2.035696   |
| C     | 3.500302   | 0.458212   | 2.016319   |
| C     | 3.158075   | 0.976640   | -0.886423  |
| C     | -4.290626  | -3.662601  | 1.749980   |
| H     | -2.281714  | -3.097813  | 1.157440   |
| C     | -6.125952  | -2.283981  | 0.943333   |
| C     | -4.868277  | 1.943042   | -2.167019  |
| H     | -2.758022  | 1.456334   | -2.072961  |
| C     | -6.408330  | 0.489229   | -0.968705  |
| C     | 2.699159   | 3.383916   | -0.900483  |
| C     | -0.617075  | 3.670109   | -0.440582  |
| C     | 0.316692   | 3.239139   | 1.757058   |
| C     | 4.427639   | -4.315016  | -1.774357  |
| H     | 2.368597   | -4.904240  | -2.098037  |
| C     | 4.737056   | -2.069349  | -0.852769  |
| C     | 2.421442   | -1.693513  | 3.425698   |
| H     | 1.783127   | -2.436129  | 1.512924   |
| C     | 3.620186   | 0.398784   | 3.411043   |

|   |           |           |           |
|---|-----------|-----------|-----------|
| H | 3.927007  | 1.305866  | 1.478344  |
| C | 4.392144  | 1.258161  | -1.484015 |
| C | -5.666475 | -3.377355 | 1.675724  |
| H | -3.950313 | -4.518489 | 2.336289  |
| H | -7.192544 | -2.055477 | 0.894124  |
| C | -6.176160 | 1.600840  | -1.777821 |
| H | -4.708770 | 2.809162  | -2.812460 |
| H | -7.424597 | 0.215687  | -0.677866 |
| C | 3.955306  | 3.627857  | -1.457987 |
| H | 2.035740  | 4.218782  | -0.678814 |
| C | -1.371675 | 4.720546  | 0.086295  |
| H | -0.670844 | 3.416409  | -1.500717 |
| C | -0.434592 | 4.295332  | 2.278939  |
| H | 0.979104  | 2.643303  | 2.387168  |
| C | 5.264637  | -3.277240 | -1.297919 |
| H | 4.863193  | -5.257488 | -2.110144 |
| H | 5.409798  | -1.307736 | -0.455719 |
| C | 3.080003  | -0.674547 | 4.121456  |
| H | 1.994099  | -2.540800 | 3.968012  |
| H | 4.141699  | 1.200430  | 3.940873  |
| C | 4.801335  | 2.564376  | -1.772033 |
| H | 5.064861  | 0.432510  | -1.721227 |
| H | -6.377966 | -4.017302 | 2.200629  |
| H | -7.015910 | 2.208207  | -2.120155 |
| H | 4.260306  | 4.657149  | -1.658793 |
| C | -1.280354 | 5.034010  | 1.446112  |
| H | -2.031863 | 5.295393  | -0.566024 |
| H | -0.362872 | 4.538613  | 3.340849  |
| H | 6.346342  | -3.432504 | -1.276716 |
| H | 3.171473  | -0.719373 | 5.209063  |
| H | 5.777017  | 2.747383  | -2.227111 |
| H | -1.870864 | 5.855244  | 1.857099  |

146

147

**Table S16.** Coordinates for  ${}^1P_3$ 

| Atoms | X/Angstrom | Y/Angstrom | Z/Angstrom |
|-------|------------|------------|------------|
| C     | -1.537438  | -0.980450  | -0.440483  |
| C     | -0.862958  | -2.148135  | -0.714698  |
| C     | -0.837105  | 0.227799   | -0.149165  |
| C     | 0.570831   | -2.185076  | -0.719084  |
| H     | -1.397789  | -3.073933  | -0.926777  |
| N     | -2.955886  | -0.936258  | -0.391963  |
| C     | 0.537461   | 0.200242   | -0.222563  |
| H     | -1.405919  | 1.100682   | 0.153457   |
| N     | 1.167757   | -3.363920  | -0.925445  |

---

|   |           |           |           |
|---|-----------|-----------|-----------|
| C | 1.287303  | -0.947160 | -0.514244 |
| C | -3.777110 | -1.737872 | 0.409046  |
| C | -3.750762 | 0.019477  | -1.030053 |
| N | 1.320370  | 1.426191  | 0.280457  |
| C | 2.528484  | -3.433470 | -0.903470 |
| C | 1.673378  | 1.199014  | 1.748195  |
| B | 2.787264  | -0.941056 | -0.642034 |
| C | -3.434071 | -2.794229 | 1.259241  |
| C | -5.122123 | -1.296240 | 0.274187  |
| C | -3.381855 | 1.021659  | -1.934613 |
| C | -5.105529 | -0.173686 | -0.644166 |
| C | 2.638954  | 1.626445  | -0.475521 |
| C | 0.438082  | 2.631928  | 0.108814  |
| C | 3.082919  | -4.742567 | -1.046224 |
| C | 3.428878  | -2.309036 | -0.756961 |
| C | 0.951932  | 0.279198  | 2.507088  |
| C | 2.700994  | 1.949693  | 2.320843  |
| C | 3.400200  | 0.491788  | -0.806024 |
| C | -4.463818 | -3.415586 | 1.966733  |
| H | -2.400164 | -3.122465 | 1.362767  |
| C | -6.137000 | -1.941457 | 0.992774  |
| C | -4.389918 | 1.845639  | -2.436257 |
| H | -2.344061 | 1.149330  | -2.240862 |
| C | -6.098196 | 0.665336  | -1.166472 |
| C | 3.070499  | 2.932316  | -0.709498 |
| C | 0.053838  | 2.952993  | -1.197077 |
| C | -0.034142 | 3.354594  | 1.196435  |
| C | 4.443365  | -4.952105 | -1.016068 |
| H | 2.377188  | -5.566605 | -1.166635 |
| C | 4.825411  | -2.583962 | -0.715997 |
| C | 1.267469  | 0.115110  | 3.858679  |
| H | 0.156689  | -0.310579 | 2.060484  |
| C | 3.002061  | 1.779417  | 3.673489  |
| H | 3.272504  | 2.657062  | 1.726077  |
| C | 4.632258  | 0.751685  | -1.443716 |
| C | -5.802377 | -3.000654 | 1.834750  |
| H | -4.222333 | -4.245186 | 2.634440  |
| H | -7.174263 | -1.613954 | 0.895641  |
| C | -5.734489 | 1.675164  | -2.056719 |
| H | -4.127648 | 2.635232  | -3.143860 |
| H | -7.142916 | 0.526735  | -0.880308 |
| C | 4.308070  | 3.140896  | -1.322825 |
| H | 2.465886  | 3.789048  | -0.420425 |
| C | -0.815847 | 4.018345  | -1.409179 |

---

|   |           |           |           |
|---|-----------|-----------|-----------|
| H | 0.427811  | 2.363685  | -2.033287 |
| C | -0.909262 | 4.426558  | 0.969958  |
| H | 0.253500  | 3.091670  | 2.211164  |
| C | 5.332393  | -3.862374 | -0.837798 |
| H | 4.841864  | -5.964721 | -1.119637 |
| H | 5.520128  | -1.756802 | -0.550782 |
| C | 2.288501  | 0.861828  | 4.447206  |
| H | 0.707691  | -0.614182 | 4.446248  |
| H | 3.807950  | 2.366970  | 4.116310  |
| C | 5.088238  | 2.044396  | -1.695538 |
| H | 5.231561  | -0.098048 | -1.769697 |
| H | -6.583298 | -3.514245 | 2.398558  |
| H | -6.498731 | 2.336244  | -2.469614 |
| H | 4.648923  | 4.160526  | -1.509808 |
| C | -1.302138 | 4.758686  | -0.324358 |
| H | -1.123017 | 4.265462  | -2.426448 |
| H | -1.287096 | 4.992282  | 1.822994  |
| H | 6.409611  | -4.038230 | -0.792455 |
| H | 2.533076  | 0.724148  | 5.501882  |
| H | 6.049740  | 2.198309  | -2.189754 |
| H | -1.991183 | 5.587858  | -0.492849 |

148

149

**Table S17.** Coordinates for <sup>3</sup>R\* (BNPA-1)

| Atoms | X/Angstrom | Y/Angstrom | Z/Angstrom |
|-------|------------|------------|------------|
| C     | 0.000051   | 1.487840   | 0.000012   |
| C     | 1.211469   | 0.784892   | -0.051948  |
| C     | -1.211430  | 0.785001   | 0.051963   |
| C     | 1.208293   | -0.624922  | -0.048171  |
| H     | 2.140624   | 1.347082   | -0.092554  |
| N     | 0.000116   | 2.905688   | 0.000014   |
| C     | -1.208380  | -0.624814  | 0.048165   |
| H     | -2.140535  | 1.347274   | 0.092575   |
| N     | 2.422837   | -1.305329  | -0.100833  |
| C     | -0.000077  | -1.372081  | -0.000011  |
| C     | 0.216089   | 3.716947   | 1.112490   |
| C     | -0.215711  | 3.716968   | -1.112476  |
| N     | -2.422985  | -1.305114  | 0.100821   |
| C     | 2.556741   | -2.700356  | -0.012428  |
| C     | 3.620764   | -0.506908  | -0.212435  |
| B     | -0.000145  | -2.877089  | -0.000026  |
| C     | 0.465239   | 3.341953   | 2.435716   |
| C     | 0.140072   | 5.080074   | 0.712721   |
| C     | -0.464909  | 3.341996   | -2.435699  |
| C     | -0.139471  | 5.080087   | -0.712726  |

---

|   |           |           |           |
|---|-----------|-----------|-----------|
| C | -2.557015 | -2.700126 | 0.012386  |
| C | -3.620840 | -0.506588 | 0.212453  |
| C | 3.856484  | -3.245787 | -0.012008 |
| C | 1.394584  | -3.536883 | 0.093286  |
| C | 4.070545  | -0.148803 | -1.509287 |
| C | 4.272428  | -0.089528 | 0.975695  |
| C | -1.394933 | -3.536757 | -0.093351 |
| C | 0.648110  | 4.362611  | 3.369960  |
| H | 0.510734  | 2.290108  | 2.720575  |
| C | 0.326663  | 6.083262  | 1.673022  |
| C | -0.647605 | 4.362671  | -3.369959 |
| H | -0.510572 | 2.290155  | -2.720545 |
| C | -0.325892 | 6.083292  | -1.673042 |
| C | -3.856807 | -3.245441 | 0.011960  |
| C | -4.070574 | -0.148470 | 1.509319  |
| C | -4.272480 | -0.089124 | -0.975661 |
| C | 4.047377  | -4.618690 | 0.150388  |
| H | 4.718924  | -2.593899 | -0.128236 |
| C | 1.651041  | -4.912096 | 0.300261  |
| C | 5.216805  | 0.659645  | -1.576231 |
| C | 5.429871  | 0.690409  | 0.817151  |
| C | -1.651515 | -4.911942 | -0.300355 |
| C | 0.581311  | 5.718327  | 2.995332  |
| H | 0.845798  | 4.102248  | 4.411827  |
| H | 0.272763  | 7.136443  | 1.389070  |
| C | -0.580590 | 5.718381  | -2.995349 |
| H | -0.845326 | 4.102326  | -4.411824 |
| H | -0.271822 | 7.136468  | -1.389104 |
| C | -4.047825 | -4.618324 | -0.150466 |
| H | -4.719188 | -2.593478 | 0.128205  |
| C | -5.216761 | 0.660081  | 1.576292  |
| C | -5.429852 | 0.690913  | -0.817087 |
| C | 2.938553  | -5.450637 | 0.330035  |
| H | 5.059408  | -5.026815 | 0.149617  |
| H | 0.809223  | -5.581442 | 0.464987  |
| C | 5.895447  | 1.066346  | -0.435203 |
| C | -2.939075 | -5.450367 | -0.330136 |
| H | -0.809758 | -5.581360 | -0.465100 |
| H | 0.729387  | 6.491704  | 3.751294  |
| H | -0.728533 | 6.491772  | -3.751322 |
| H | -5.059892 | -5.026357 | -0.149700 |
| C | -5.895380 | 1.066866  | 0.435280  |
| H | 3.075795  | -6.522668 | 0.488668  |
| H | 6.789387  | 1.687132  | -0.522747 |

---

---

|   |           |           |           |
|---|-----------|-----------|-----------|
| H | -3.076415 | -6.522381 | -0.488793 |
| H | -6.789263 | 1.687731  | 0.522848  |
| H | 5.587318  | 0.986107  | -2.546037 |
| H | 5.975983  | 1.023617  | 1.698102  |
| H | -5.587232 | 0.986556  | 2.546109  |
| H | -5.975944 | 1.024189  | -1.698024 |
| C | -3.874695 | -0.379534 | -2.453459 |
| C | -3.411066 | -0.484462 | 2.879533  |
| C | 3.874602  | -0.379935 | 2.453483  |
| C | 3.411025  | -0.484711 | -2.879516 |
| C | 2.299000  | -1.551029 | -2.910408 |
| H | 2.636667  | -2.519264 | -2.520245 |
| H | 1.390590  | -1.252844 | -2.376503 |
| H | 2.014077  | -1.703445 | -3.963073 |
| C | 2.809302  | 0.827169  | -3.434970 |
| H | 3.564304  | 1.622413  | -3.526177 |
| H | 2.377056  | 0.650926  | -4.433444 |
| H | 2.007112  | 1.199167  | -2.778955 |
| C | 4.505773  | -1.003608 | -3.843690 |
| H | 5.300236  | -0.270091 | -4.036820 |
| H | 4.973685  | -1.915890 | -3.441285 |
| H | 4.050605  | -1.254812 | -4.814226 |
| C | 5.014090  | -1.207424 | 3.092943  |
| H | 5.104023  | -2.185455 | 2.595187  |
| H | 5.987891  | -0.700382 | 3.028944  |
| H | 4.795523  | -1.386190 | 4.157978  |
| C | 2.566654  | -1.145821 | 2.731094  |
| H | 1.678668  | -0.623077 | 2.355151  |
| H | 2.572350  | -2.166550 | 2.334413  |
| H | 2.457032  | -1.225443 | 3.823876  |
| C | 3.734959  | 0.977935  | 3.184697  |
| H | 3.459384  | 0.805432  | 4.237203  |
| H | 4.662386  | 1.567265  | 3.177626  |
| H | 2.945394  | 1.590795  | 2.722397  |
| C | -5.014263 | -1.206906 | -3.092927 |
| H | -5.988018 | -0.699778 | -3.028908 |
| H | -4.795722 | -1.385669 | -4.157968 |
| H | -5.104279 | -2.184941 | -2.595191 |
| C | -2.566817 | -1.145530 | -2.731100 |
| H | -1.678781 | -0.622872 | -2.355153 |
| H | -2.572601 | -2.166266 | -2.334440 |
| H | -2.457213 | -1.225137 | -3.823885 |
| C | -3.734939 | 0.978340  | -3.184645 |
| H | -3.459392 | 0.805836  | -4.237158 |

---

|   |           |           |           |
|---|-----------|-----------|-----------|
| H | -4.662313 | 1.567753  | -3.177549 |
| H | -2.945313 | 1.591119  | -2.722341 |
| C | -2.299149 | -1.550895 | 2.910389  |
| H | -2.636922 | -2.519087 | 2.520211  |
| H | -1.390716 | -1.252792 | 2.376477  |
| H | -2.014227 | -1.703362 | 3.963046  |
| C | -4.505849 | -1.003263 | 3.843719  |
| H | -4.050687 | -1.254531 | 4.814242  |
| H | -5.300232 | -0.269666 | 4.036878  |
| H | -4.973864 | -1.915489 | 3.441308  |
| C | -2.809202 | 0.827349  | 3.434994  |
| H | -3.564123 | 1.622667  | 3.526222  |
| H | -2.376958 | 0.651050  | 4.433459  |
| H | -2.006985 | 1.199275  | 2.778971  |

150

151

**Table S18.** Coordinates for <sup>1</sup>R (BNPA-1)

| Atoms | X/Angstrom | Y/Angstrom | Z/Angstrom |
|-------|------------|------------|------------|
| C     | -0.000013  | -1.486269  | 0.000007   |
| C     | 1.220487   | -0.815931  | -0.038376  |
| C     | -1.220504  | -0.815914  | 0.038381   |
| C     | 1.220317   | 0.589892   | -0.045938  |
| H     | 2.142298   | -1.388808  | -0.060029  |
| N     | -0.000023  | -2.906909  | 0.000019   |
| C     | -1.220316  | 0.589908   | 0.045923   |
| H     | -2.142323  | -1.388779  | 0.060042   |
| N     | 2.429074   | 1.274010   | -0.075205  |
| C     | 0.000005   | 1.318813   | -0.000013  |
| C     | 0.478094   | -3.718018  | -1.028903  |
| C     | -0.478133  | -3.717994  | 1.028965   |
| N     | -2.429063  | 1.274043   | 0.075181   |
| C     | 2.538260   | 2.666158   | -0.169254  |
| C     | 3.640153   | 0.490712   | -0.055611  |
| B     | 0.000015   | 2.834057   | -0.000024  |
| C     | 1.016334   | -3.349342  | -2.265192  |
| C     | 0.305834   | -5.080154  | -0.658221  |
| C     | -1.016372  | -3.349287  | 2.265244   |
| C     | -0.305867  | -5.080138  | 0.658318   |
| C     | -2.538231  | 2.666193   | 0.169210   |
| C     | -3.640153  | 0.490761   | 0.055602   |
| C     | 3.829251   | 3.240155   | -0.233406  |
| C     | 1.380909   | 3.495863   | -0.214157  |
| C     | 4.186867   | 0.126348   | 1.201313   |
| C     | 4.230835   | 0.108362   | -1.289806  |
| C     | -1.380869  | 3.495883   | 0.214098   |



---

|   |           |           |           |
|---|-----------|-----------|-----------|
| C | 1.406452  | -4.372393 | -3.129940 |
| H | 1.121215  | -2.300275 | -2.540412 |
| C | 0.705827  | -6.086846 | -1.547198 |
| C | -1.406484 | -4.372317 | 3.130021  |
| H | -1.121256 | -2.300214 | 2.540437  |
| C | -0.705855 | -6.086809 | 1.547322  |
| C | -3.829215 | 3.240208  | 0.233354  |
| C | -4.186876 | 0.126388  | -1.201315 |
| C | -4.230838 | 0.108438  | 1.289804  |
| C | 3.982654  | 4.605739  | -0.423056 |
| H | 4.709468  | 2.607386  | -0.148138 |
| C | 1.595669  | 4.873630  | -0.456912 |
| C | 5.360122  | -0.646111 | 1.183601  |
| C | 5.423329  | -0.629406 | -1.217659 |
| C | -1.595612 | 4.873658  | 0.456832  |
| C | 1.258264  | -5.727222 | -2.776202 |
| H | 1.833407  | -4.112925 | -4.100912 |
| H | 0.582700  | -7.138623 | -1.280396 |
| C | -1.258291 | -5.727154 | 2.776317  |
| H | -1.833438 | -4.112825 | 4.100986  |
| H | -0.582724 | -7.138592 | 1.280547  |
| C | -3.982599 | 4.605797  | 0.422983  |
| H | -4.709440 | 2.607449  | 0.148097  |
| C | -5.360144 | -0.646051 | -1.183589 |
| C | -5.423343 | -0.629313 | 1.217671  |
| C | 2.860502  | 5.433499  | -0.568006 |
| H | 4.989453  | 5.025769  | -0.477307 |
| H | 0.729764  | 5.520214  | -0.586347 |
| C | 5.979354  | -1.010006 | -0.003578 |
| C | -2.860437 | 5.433545  | 0.567919  |
| H | -0.729697 | 5.520233  | 0.586257  |
| H | 1.575239  | -6.502925 | -3.475677 |
| H | -1.575262 | -6.502840 | 3.475813  |
| H | -4.989393 | 5.025841  | 0.477228  |
| C | -5.979379 | -1.009919 | 0.003597  |
| H | 2.979589  | 6.501346  | -0.759508 |
| H | 6.899346  | -1.597835 | 0.016244  |
| H | -2.979510 | 6.501396  | 0.759404  |
| H | -6.899381 | -1.597733 | -0.016214 |
| H | 5.804397  | -0.969336 | 2.123551  |
| H | 5.931011  | -0.920660 | -2.134920 |
| H | -5.804428 | -0.969280 | -2.123533 |
| H | -5.931028 | -0.920545 | 2.134937  |
| C | -3.747738 | 0.444645  | 2.732403  |

---

---

|   |           |           |           |
|---|-----------|-----------|-----------|
| C | -3.635392 | 0.447718  | -2.621343 |
| C | 3.747744  | 0.444555  | -2.732411 |
| C | 3.635382  | 0.447705  | 2.621335  |
| C | 2.434587  | 1.404641  | 2.743624  |
| H | 2.633789  | 2.392630  | 2.310817  |
| H | 1.516109  | 1.001902  | 2.303795  |
| H | 2.237196  | 1.552908  | 3.816958  |
| C | 3.211404  | -0.890305 | 3.271320  |
| H | 4.040235  | -1.611851 | 3.320240  |
| H | 2.855136  | -0.713195 | 4.299088  |
| H | 2.390977  | -1.354064 | 2.701729  |
| C | 4.771910  | 1.097215  | 3.448061  |
| H | 5.657564  | 0.454475  | 3.545592  |
| H | 5.089521  | 2.045465  | 2.985917  |
| H | 4.410349  | 1.318884  | 4.464514  |
| C | 4.712829  | 1.499870  | -3.319548 |
| H | 4.642058  | 2.446730  | -2.764025 |
| H | 5.758699  | 1.158498  | -3.285074 |
| H | 4.454306  | 1.701902  | -4.371914 |
| C | 2.313290  | 0.980617  | -2.907265 |
| H | 1.558428  | 0.286350  | -2.516168 |
| H | 2.156940  | 1.964334  | -2.452843 |
| H | 2.127495  | 1.093015  | -3.986784 |
| C | 3.819554  | -0.842336 | -3.593343 |
| H | 3.397425  | -0.640491 | -4.590007 |
| H | 4.845650  | -1.204087 | -3.745566 |
| H | 3.240990  | -1.657186 | -3.132759 |
| C | -4.712805 | 1.499984  | 3.319525  |
| H | -5.758680 | 1.158628  | 3.285059  |
| H | -4.454276 | 1.702028  | 4.371888  |
| H | -4.642020 | 2.446834  | 2.763988  |
| C | -2.313275 | 0.980686  | 2.907246  |
| H | -1.558425 | 0.286402  | 2.516158  |
| H | -2.156910 | 1.964394  | 2.452809  |
| H | -2.127477 | 1.093097  | 3.986763  |
| C | -3.819567 | -0.842232 | 3.593355  |
| H | -3.397433 | -0.640379 | 4.590014  |
| H | -4.845669 | -1.203964 | 3.745585  |
| H | -3.241019 | -1.657098 | 3.132782  |
| C | -2.434571 | 1.404618  | -2.743650 |
| H | -2.633741 | 2.392618  | -2.310854 |
| H | -1.516102 | 1.001857  | -2.303821 |
| H | -2.237181 | 1.552867  | -3.816986 |
| C | -4.771909 | 1.097253  | -3.448065 |

---

|   |           |           |           |
|---|-----------|-----------|-----------|
| H | -4.410352 | 1.318902  | -4.464524 |
| H | -5.657583 | 0.454538  | -3.545579 |
| H | -5.089488 | 2.045517  | -2.985927 |
| C | -3.211456 | -0.890309 | -3.271321 |
| H | -4.040307 | -1.611832 | -3.320232 |
| H | -2.855190 | -0.713216 | -4.299093 |
| H | -2.391038 | -1.354086 | -2.701732 |

152

153

**Table S19.** Coordinates for  ${}^3\text{TS}_3^*$  (BNPA-1)

| Atoms | X/Angstrom | Y/Angstrom | Z/Angstrom |
|-------|------------|------------|------------|
| C     | -0.059918  | 1.415567   | -0.211613  |
| C     | -1.251669  | 0.697025   | -0.314835  |
| C     | 1.170991   | 0.770787   | -0.086873  |
| C     | -1.206518  | -0.724631  | -0.300644  |
| H     | -2.188882  | 1.231694   | -0.431418  |
| N     | -0.078459  | 2.830604   | -0.239610  |
| C     | 1.223932   | -0.645427  | -0.075426  |
| H     | 2.073118   | 1.368374   | 0.003419   |
| N     | -2.382621  | -1.418751  | -0.348238  |
| C     | 0.046583   | -1.411059  | -0.211632  |
| C     | 0.640874   | 3.627449   | -1.135070  |
| C     | -0.685017  | 3.657800   | 0.712383   |
| N     | 2.447619   | -1.266967  | 0.086701   |
| C     | -2.427042  | -2.789731  | -0.490425  |
| C     | -3.885692  | -0.520454  | 0.035870   |
| B     | 0.109992   | -2.917430  | -0.275193  |
| C     | 1.394146   | 3.247313   | -2.249695  |
| C     | 0.474776   | 4.991120   | -0.770283  |
| C     | -1.452723  | 3.304106   | 1.823355   |
| C     | -0.371574  | 5.009874   | 0.409541   |
| C     | 2.608253   | -2.654711  | 0.168520   |
| C     | 3.614340   | -0.425973  | 0.241674   |
| C     | -3.709996  | -3.387148  | -0.594635  |
| C     | -1.246661  | -3.603197  | -0.571443  |
| C     | -3.840973  | -0.018096  | 1.382499   |
| C     | -4.322359  | 0.306347   | -1.056874  |
| C     | 1.493403   | -3.533303  | 0.008531   |
| C     | 2.000741   | 4.258633   | -2.996055  |
| H     | 1.497863   | 2.199250   | -2.530782  |
| C     | 1.092243   | 5.986063   | -1.539371  |
| C     | -1.931273  | 4.338041   | 2.628266   |
| H     | -1.684415  | 2.263047   | 2.040478   |
| C     | -0.866644  | 6.028639   | 1.234250   |
| C     | 3.897944   | -3.167625  | 0.441179   |

---

|   |           |           |           |
|---|-----------|-----------|-----------|
| C | 4.366081  | -0.091981 | -0.915535 |
| C | 3.940533  | 0.042319  | 1.540010  |
| C | -3.843422 | -4.729546 | -0.899656 |
| H | -4.570303 | -2.742496 | -0.433113 |
| C | -1.435234 | -4.958517 | -0.908489 |
| C | -4.168825 | 1.325689  | 1.583218  |
| C | -4.632423 | 1.639861  | -0.762270 |
| C | 1.746867  | -4.915176 | 0.195093  |
| C | 1.855993  | 5.613969  | -2.645536 |
| H | 2.594958  | 3.988917  | -3.871577 |
| H | 0.974110  | 7.038933  | -1.275060 |
| C | -1.647453 | 5.685782  | 2.337903  |
| H | -2.542567 | 4.091946  | 3.498922  |
| H | -0.639005 | 7.074296  | 1.017193  |
| C | 4.092546  | -4.532496 | 0.582489  |
| H | 4.738586  | -2.488137 | 0.558859  |
| C | 5.499076  | 0.712801  | -0.716900 |
| C | 5.068799  | 0.873315  | 1.642365  |
| C | -2.697567 | -5.518591 | -1.092285 |
| H | -4.838800 | -5.168869 | -0.988330 |
| H | -0.562530 | -5.594693 | -1.048664 |
| C | -4.521688 | 2.167923  | 0.526828  |
| C | 3.008222  | -5.418371 | 0.472520  |
| H | 0.909887  | -5.609114 | 0.146407  |
| H | 2.343230  | 6.380623  | -3.250673 |
| H | -2.041109 | 6.469824  | 2.987378  |
| H | 5.094170  | -4.910317 | 0.797081  |
| C | 5.844906  | 1.195699  | 0.538398  |
| H | -2.794401 | -6.573043 | -1.359117 |
| H | -4.735936 | 3.221207  | 0.711485  |
| H | 3.156578  | -6.490685 | 0.612156  |
| H | 6.723276  | 1.833567  | 0.654929  |
| H | -4.167687 | 1.745202  | 2.588145  |
| H | -4.979775 | 2.304339  | -1.550843 |
| H | 6.126737  | 0.976237  | -1.564917 |
| H | 5.349051  | 1.279338  | 2.612638  |
| C | 3.191035  | -0.212771 | 2.882634  |
| C | 4.121362  | -0.563767 | -2.379157 |
| C | -4.565322 | -0.204319 | -2.501865 |
| C | -3.552404 | -0.915758 | 2.612355  |
| C | -2.059924 | -1.308125 | 2.729087  |
| H | -1.748026 | -2.030336 | 1.966162  |
| H | -1.409488 | -0.422661 | 2.648657  |
| H | -1.872522 | -1.776119 | 3.709766  |

---

---

|   |           |           |           |
|---|-----------|-----------|-----------|
| C | -3.915891 | -0.200419 | 3.929927  |
| H | -4.964382 | 0.133454  | 3.939264  |
| H | -3.774609 | -0.897190 | 4.770961  |
| H | -3.274335 | 0.673860  | 4.120826  |
| C | -4.407582 | -2.196099 | 2.548726  |
| H | -5.476149 | -1.946021 | 2.455612  |
| H | -4.132948 | -2.831030 | 1.699127  |
| H | -4.270147 | -2.792164 | 3.466572  |
| C | -5.789612 | -1.145864 | -2.509663 |
| H | -5.632875 | -2.030435 | -1.880586 |
| H | -6.681592 | -0.619629 | -2.135138 |
| H | -6.000081 | -1.496945 | -3.534501 |
| C | -3.349529 | -0.934287 | -3.114066 |
| H | -2.434734 | -0.327445 | -3.027271 |
| H | -3.161163 | -1.909756 | -2.656665 |
| H | -3.533169 | -1.112871 | -4.186220 |
| C | -4.890968 | 0.953073  | -3.469600 |
| H | -5.030312 | 0.546181  | -4.483133 |
| H | -5.818605 | 1.478252  | -3.199336 |
| H | -4.075461 | 1.691805  | -3.513303 |
| C | 4.216393  | -0.748121 | 3.912104  |
| H | 5.049279  | -0.055305 | 4.093878  |
| H | 3.714582  | -0.922455 | 4.876597  |
| H | 4.639025  | -1.706486 | 3.570926  |
| C | 2.024491  | -1.219162 | 2.901132  |
| H | 1.165884  | -0.903985 | 2.299417  |
| H | 2.328143  | -2.226146 | 2.591088  |
| H | 1.668736  | -1.293865 | 3.940228  |
| C | 2.621387  | 1.142237  | 3.365189  |
| H | 5.048577  | -2.002238 | -3.736257 |
| H | 6.166021  | -1.369039 | -2.498482 |
| H | 4.932813  | -2.576847 | -2.053451 |
| C | 4.384256  | 0.618909  | -3.345670 |
| H | 5.437815  | 0.928268  | -3.375992 |
| H | 4.109707  | 0.320912  | -4.368875 |
| H | 3.780607  | 1.497121  | -3.069054 |
| H | 2.131577  | 1.015574  | 4.343896  |
| H | 3.401542  | 1.909724  | 3.473925  |
| H | 1.867789  | 1.523747  | 2.658616  |
| C | 2.712826  | -1.079582 | -2.734867 |
| H | 2.448367  | -2.015345 | -2.232049 |
| H | 1.932050  | -0.335419 | -2.527871 |
| H | 2.691419  | -1.282227 | -3.816506 |
| C | 5.130368  | -1.694940 | -2.680857 |

---

**Table S20.** Coordinates for  ${}^3\text{IM}_3^*$  (BNPA-1)

| Atoms | X/Angstrom | Y/Angstrom | Z/Angstrom |
|-------|------------|------------|------------|
| C     | 2.351523   | 0.800354   | 0.722981   |
| C     | 1.736790   | -0.388406  | 0.328314   |
| C     | 1.729415   | 1.669766   | 1.621053   |
| C     | 0.443786   | -0.712051  | 0.813208   |
| H     | 2.259829   | -1.051271  | -0.354876  |
| N     | 3.614198   | 1.127127   | 0.171462   |
| C     | 0.434454   | 1.362939   | 2.104778   |
| H     | 2.198794   | 2.603099   | 1.928564   |
| N     | -0.144274  | -1.905934  | 0.428381   |
| C     | -0.233974  | 0.166656   | 1.683334   |
| C     | 4.781838   | 1.401890   | 0.889875   |
| C     | 3.895639   | 1.212480   | -1.196338  |
| N     | -0.117353  | 2.272619   | 2.945195   |
| C     | -1.406197  | -2.316208  | 0.870758   |
| C     | 0.615272   | -2.793576  | -0.427205  |
| B     | -1.635865  | -0.129673  | 2.176608   |
| C     | 4.992938   | 1.405467   | 2.271939   |
| C     | 5.833117   | 1.664951   | -0.030323  |
| C     | 3.037489   | 1.058313   | -2.289475  |
| C     | 5.266766   | 1.546198   | -1.361419  |
| C     | -1.398583  | 2.108984   | 3.380893   |
| C     | -3.386852  | 1.979375   | -1.361191  |
| C     | -1.881089  | -3.583214  | 0.453254   |
| C     | -2.193523  | -1.501730  | 1.742658   |
| C     | 0.440393   | -2.709012  | -1.835025  |
| C     | 1.518402   | -3.703778  | 0.181459   |
| C     | -2.259626  | 0.999108   | 3.047952   |
| C     | 6.279842   | 1.695610   | 2.727116   |
| H     | 4.182685   | 1.187894   | 2.968159   |
| C     | 7.115267   | 1.953122   | 0.454638   |
| C     | 3.578744   | 1.223307   | -3.564770  |
| H     | 1.982764   | 0.825990   | -2.151654  |
| C     | 5.784479   | 1.705253   | -2.653792  |
| C     | -1.884401  | 3.173460   | 4.192436   |
| C     | -2.416277  | 2.768667   | -1.949444  |
| C     | -4.256999  | 1.088684   | -1.960743  |
| C     | -3.105352  | -4.055776  | 0.894156   |
| H     | -1.274138  | -4.197667  | -0.206972  |
| C     | -3.424762  | -2.050760  | 2.180359   |
| C     | 1.191445   | -3.598242  | -2.619475  |
| C     | 2.261114   | -4.528133  | -0.680686  |

---

|   |           |           |           |
|---|-----------|-----------|-----------|
| C | -3.584543 | 1.072782  | 3.517057  |
| C | 7.330736  | 1.970078  | 1.832059  |
| H | 6.472579  | 1.707899  | 3.801743  |
| H | 7.933569  | 2.157758  | -0.238806 |
| C | 4.938197  | 1.538186  | -3.749274 |
| H | 2.928870  | 1.107696  | -4.434609 |
| H | 6.836108  | 1.961408  | -2.798084 |
| C | -3.191386 | 3.187550  | 4.644177  |
| H | -1.185920 | 3.980091  | 4.419928  |
| C | -2.327592 | 2.638522  | -3.350314 |
| C | -4.125467 | 0.994497  | -3.361078 |
| C | -3.887250 | -3.291365 | 1.775247  |
| H | -3.451128 | -5.035633 | 0.558353  |
| H | -4.028385 | -1.478731 | 2.880934  |
| C | 2.095969  | -4.489063 | -2.057473 |
| C | -4.052664 | 2.133725  | 4.293592  |
| H | -4.294530 | 0.291567  | 3.252703  |
| H | 8.324721  | 2.194929  | 2.222933  |
| H | 5.330057  | 1.658570  | -4.760849 |
| H | -3.555102 | 4.015221  | 5.256646  |
| C | -3.174199 | 1.763860  | -4.038371 |
| H | -4.843267 | -3.672055 | 2.138640  |
| H | 2.679299  | -5.153796 | -2.697839 |
| H | -5.092953 | 2.143734  | 4.625840  |
| H | -3.089214 | 1.678063  | -5.123963 |
| H | 1.072753  | -3.589759 | -3.700455 |
| H | 2.988586  | -5.222037 | -0.263676 |
| H | -1.587528 | 3.220795  | -3.904525 |
| H | -4.768930 | 0.313739  | -3.923905 |
| C | -5.263095 | 0.252148  | -1.165350 |
| C | -1.489242 | 3.678899  | -1.139120 |
| C | 1.834582  | -3.893127 | 1.695734  |
| C | -0.531837 | -1.780086 | -2.614660 |
| C | -1.028458 | -0.521903 | -1.885695 |
| H | -1.678408 | -0.731837 | -1.032213 |
| H | -0.197940 | 0.107939  | -1.545567 |
| H | -1.618145 | 0.071638  | -2.593399 |
| C | 0.166151  | -1.260833 | -3.897845 |
| H | 0.342431  | -2.047253 | -4.645007 |
| H | -0.474562 | -0.502403 | -4.372379 |
| H | 1.134760  | -0.794267 | -3.661842 |
| C | -1.764459 | -2.614341 | -3.029450 |
| H | -1.471952 | -3.498550 | -3.617257 |
| H | -2.327212 | -2.956450 | -2.149566 |

---

|   |           |           |           |
|---|-----------|-----------|-----------|
| H | -2.440948 | -1.997775 | -3.642895 |
| C | 0.947015  | -3.174814 | 2.729536  |
| H | 1.021699  | -2.083437 | 2.686983  |
| H | -0.108139 | -3.463307 | 2.651352  |
| H | 1.292887  | -3.477885 | 3.729950  |
| C | 3.286498  | -3.415614 | 1.932313  |
| H | 4.007781  | -3.945026 | 1.292376  |
| H | 3.380294  | -2.337655 | 1.728211  |
| H | 3.573155  | -3.587942 | 2.982311  |
| C | 1.718140  | -5.400270 | 2.033245  |
| H | 1.936946  | -5.556451 | 3.101061  |
| H | 0.695069  | -5.759957 | 1.839873  |
| H | 2.412944  | -6.029344 | 1.460626  |
| C | -6.681123 | 0.465144  | -1.726958 |
| H | -6.758731 | 0.139326  | -2.775823 |
| H | -7.413037 | -0.115428 | -1.141657 |
| H | -6.967130 | 1.527684  | -1.679765 |
| C | -5.233032 | 0.671445  | 0.311501  |
| H | -4.225916 | 0.549120  | 0.732038  |
| H | -5.519219 | 1.727235  | 0.434231  |
| H | -5.928734 | 0.051964  | 0.900065  |
| C | -4.881201 | -1.237642 | -1.270553 |
| H | -5.605311 | -1.858709 | -0.718768 |
| H | -4.866551 | -1.578052 | -2.317514 |
| H | -3.887258 | -1.420604 | -0.838371 |
| C | -1.957134 | 3.725538  | 0.322539  |
| H | -2.958270 | 4.176126  | 0.405559  |
| H | -2.011999 | 2.714543  | 0.748593  |
| H | -1.256758 | 4.310576  | 0.937622  |
| C | -1.498130 | 5.102941  | -1.724199 |
| H | -0.858530 | 5.764196  | -1.117311 |
| H | -1.115326 | 5.125853  | -2.756329 |
| H | -2.517461 | 5.520129  | -1.729678 |
| C | -0.057948 | 3.108107  | -1.190747 |
| H | 0.309030  | 3.022296  | -2.225484 |
| H | 0.637037  | 3.758296  | -0.635414 |
| H | -0.022327 | 2.111195  | -0.730259 |

156

157

**Table S21.** Coordinates for <sup>1</sup>IM<sub>3</sub> (BNPA-1)

| Atoms | X/Angstrom | Y/Angstrom | Z/Angstrom |
|-------|------------|------------|------------|
| C     | -2.279375  | -0.778996  | 0.759385   |
| C     | -1.682432  | 0.420988   | 0.349752   |
| C     | -1.621367  | -1.653824  | 1.615208   |
| C     | -0.377339  | 0.740782   | 0.779747   |



---

|   |           |           |           |
|---|-----------|-----------|-----------|
| H | -2.239259 | 1.090913  | -0.298699 |
| N | -3.566747 | -1.097576 | 0.258595  |
| C | -0.308676 | -1.343611 | 2.058630  |
| H | -2.071757 | -2.594613 | 1.928089  |
| N | 0.199348  | 1.939002  | 0.375848  |
| C | 0.338278  | -0.139926 | 1.622830  |
| C | -4.695567 | -1.405716 | 1.023786  |
| C | -3.913903 | -1.147114 | -1.095389 |
| N | 0.276059  | -2.253783 | 2.870817  |
| C | 1.468403  | 2.359298  | 0.787378  |
| C | -0.585364 | 2.818211  | -0.462305 |
| B | 1.745715  | 0.172246  | 2.090260  |
| C | -4.840602 | -1.450123 | 2.413913  |
| C | -5.787648 | -1.656167 | 0.148525  |
| C | -3.114598 | -0.947288 | -2.225656 |
| C | -5.288031 | -1.493392 | -1.204006 |
| C | 1.549571  | -2.067841 | 3.297683  |
| C | 3.167183  | -2.056877 | -1.367383 |
| C | 1.923609  | 3.628917  | 0.357135  |
| C | 2.281615  | 1.553940  | 1.644500  |
| C | -0.450976 | 2.724966  | -1.874570 |
| C | -1.471669 | 3.732705  | 0.163695  |
| C | 2.388274  | -0.936517 | 2.968761  |
| C | -6.100997 | -1.767466 | 2.921530  |
| H | -3.999917 | -1.242368 | 3.076012  |
| C | -7.042020 | -1.973124 | 0.685684  |
| C | -3.716490 | -1.082127 | -3.476973 |
| H | -2.058608 | -0.699965 | -2.133713 |
| C | -5.867469 | -1.621401 | -2.473380 |
| C | 2.058640  | -3.122816 | 4.116255  |
| C | 2.208057  | -2.848238 | -1.950329 |
| C | 4.118745  | -1.232719 | -1.917751 |
| C | 3.152620  | 4.115943  | 0.771827  |
| H | 1.297513  | 4.236452  | -0.291651 |
| C | 3.515391  | 2.116103  | 2.053426  |
| C | -1.222124 | 3.609911  | -2.643935 |
| C | -2.234514 | 4.555637  | -0.682412 |
| C | 3.704999  | -0.969573 | 3.472703  |
| C | -7.191058 | -2.030274 | 2.070616  |
| H | -6.241655 | -1.811074 | 4.003438  |
| H | -7.890312 | -2.168509 | 0.026383  |
| C | -5.079164 | -1.411149 | -3.604045 |
| H | -3.112498 | -0.930243 | -4.374016 |
| H | -6.922091 | -1.886582 | -2.572837 |

---

---

|   |           |           |           |
|---|-----------|-----------|-----------|
| C | 3.354036  | -3.098847 | 4.588545  |
| H | 1.378103  | -3.947128 | 4.334816  |
| C | 2.199643  | -2.753992 | -3.363120 |
| C | 4.052310  | -1.181478 | -3.330793 |
| C | 3.958802  | 3.361660  | 1.637509  |
| H | 3.480695  | 5.098837  | 0.426977  |
| H | 4.141996  | 1.550995  | 2.738814  |
| C | -2.107771 | 4.507759  | -2.062697 |
| C | 4.189413  | -2.013587 | 4.256761  |
| H | 4.394591  | -0.163283 | 3.232854  |
| H | -8.162627 | -2.277682 | 2.502194  |
| H | -5.519456 | -1.506896 | -4.598217 |
| H | 3.732757  | -3.915101 | 5.207359  |
| C | 3.105129  | -1.929212 | -4.031609 |
| H | 4.918699  | 3.751114  | 1.981090  |
| H | -2.706078 | 5.170701  | -2.691032 |
| H | 5.221065  | -1.989118 | 4.614386  |
| H | 3.076258  | -1.872892 | -5.121789 |
| H | -1.134271 | 3.595204  | -3.727678 |
| H | -2.946556 | 5.255827  | -0.249143 |
| H | 1.466694  | -3.333709 | -3.929817 |
| H | 4.760358  | -0.549396 | -3.873121 |
| C | 5.160104  | -0.426856 | -1.132233 |
| C | 1.207622  | -3.729410 | -1.193291 |
| C | -1.743510 | 3.936307  | 1.684414  |
| C | 0.504015  | 1.792929  | -2.672614 |
| C | 0.993262  | 0.522928  | -1.958605 |
| H | 1.658221  | 0.720476  | -1.114326 |
| H | 0.159441  | -0.095790 | -1.606028 |
| H | 1.562915  | -0.075158 | -2.679870 |
| C | -0.209348 | 1.293066  | -3.954899 |
| H | -0.379876 | 2.087234  | -4.695079 |
| H | 0.417692  | 0.530180  | -4.440609 |
| H | -1.182416 | 0.837184  | -3.715995 |
| C | 1.743054  | 2.616571  | -3.089767 |
| H | 1.455104  | 3.513473  | -3.660383 |
| H | 2.320382  | 2.937931  | -2.211438 |
| H | 2.403993  | 2.001451  | -3.722048 |
| C | -0.859436 | 3.188893  | 2.700061  |
| H | -0.969142 | 2.100540  | 2.654065  |
| H | 0.202405  | 3.445102  | 2.604923  |
| H | -1.178806 | 3.499300  | 3.707141  |
| C | -3.204438 | 3.508723  | 1.959441  |
| H | -3.925938 | 4.062353  | 1.340802  |

---

|   |           |           |           |
|---|-----------|-----------|-----------|
| H | -3.338788 | 2.434587  | 1.757534  |
| H | -3.455941 | 3.689013  | 3.017022  |
| C | -1.565907 | 5.439863  | 2.009994  |
| H | -1.762884 | 5.611991  | 3.079755  |
| H | -0.532745 | 5.758706  | 1.799183  |
| H | -2.244457 | 6.089855  | 1.440851  |
| C | 6.566881  | -0.706770 | -1.692166 |
| H | 6.669803  | -0.379972 | -2.738262 |
| H | 7.318994  | -0.161722 | -1.099070 |
| H | 6.804171  | -1.781077 | -1.644585 |
| C | 5.114538  | -0.831346 | 0.345744  |
| H | 4.110405  | -0.675905 | 0.757538  |
| H | 5.366422  | -1.895156 | 0.476734  |
| H | 5.828748  | -0.229312 | 0.929002  |
| C | 4.836859  | 1.074548  | -1.264366 |
| H | 5.590186  | 1.673254  | -0.728218 |
| H | 4.831444  | 1.394955  | -2.317820 |
| H | 3.854950  | 1.307193  | -0.830453 |
| C | 1.609092  | -3.806100 | 0.284272  |
| H | 2.572702  | -4.324208 | 0.406579  |
| H | 1.718056  | -2.797533 | 0.704607  |
| H | 0.845421  | -4.338405 | 0.869269  |
| C | 1.190185  | -5.146521 | -1.793276 |
| H | 0.512163  | -5.787770 | -1.207558 |
| H | 0.832850  | -5.153487 | -2.834616 |
| H | 2.194411  | -5.598030 | -1.771872 |
| C | -0.192050 | -3.097251 | -1.316058 |
| H | -0.495623 | -2.983776 | -2.368349 |
| H | -0.942554 | -3.725116 | -0.811077 |
| H | -0.213472 | -2.106610 | -0.842684 |

158

159

**Table S22.** Coordinates for MECP (BNPA-1)

| Atoms | X/Angstrom | Y/Angstrom | Z/Angstrom |
|-------|------------|------------|------------|
| C     | 0.140181   | 1.578326   | -0.398460  |
| C     | -1.073050  | 0.908896   | -0.499637  |
| C     | 1.349692   | 0.873964   | -0.407288  |
| C     | -1.104239  | -0.487212  | -0.662332  |
| H     | -2.007904  | 1.453067   | -0.408821  |
| N     | 0.149848   | 2.987890   | -0.254612  |
| C     | 1.333125   | -0.534595  | -0.492754  |
| H     | 2.281973   | 1.420070   | -0.337823  |
| N     | -2.342684  | -1.071218  | -0.778681  |
| C     | 0.117041   | -1.238836  | -0.678771  |
| C     | -0.666452  | 3.889671   | -0.953661  |

---

|   |           |           |           |
|---|-----------|-----------|-----------|
| C | 0.891276  | 3.707281  | 0.694570  |
| N | 2.531215  | -1.238978 | -0.390549 |
| C | -2.452323 | -2.426117 | -1.050019 |
| C | -3.962663 | -0.491483 | 0.739622  |
| B | 0.090413  | -2.746729 | -0.851569 |
| C | -1.557713 | 3.655931  | -2.008200 |
| C | -0.441801 | 5.197816  | -0.451602 |
| C | 1.803757  | 3.250582  | 1.649573  |
| C | 0.552007  | 5.084419  | 0.597326  |
| C | 2.623626  | -2.634526 | -0.497721 |
| C | 3.722421  | -0.477127 | -0.080239 |
| C | -3.764114 | -2.917707 | -1.291726 |
| C | -1.323836 | -3.318873 | -1.168268 |
| C | -3.855933 | -1.364248 | 1.811893  |
| C | -5.129329 | -0.079715 | 0.092544  |
| C | 1.464746  | -3.451526 | -0.686319 |
| C | -2.244024 | 4.751300  | -2.537186 |
| H | -1.722201 | 2.655743  | -2.406443 |
| C | -1.140871 | 6.282926  | -1.003844 |
| C | 2.399910  | 4.188530  | 2.491369  |
| H | 2.050839  | 2.193419  | 1.739610  |
| C | 1.164758  | 6.007945  | 1.455209  |
| C | 3.905797  | -3.229025 | -0.409471 |
| C | 4.475179  | 0.068161  | -1.153911 |
| C | 4.062271  | -0.266269 | 1.291318  |
| C | -3.981077 | -4.236505 | -1.658454 |
| H | -4.603913 | -2.237939 | -1.183303 |
| C | -1.598416 | -4.636613 | -1.596801 |
| C | -4.994802 | -2.183282 | 1.994500  |
| C | -6.243969 | -0.904377 | 0.364130  |
| C | 1.674814  | -4.854733 | -0.691759 |
| C | -2.043683 | 6.051413  | -2.039959 |
| H | -2.949400 | 4.586241  | -3.354784 |
| H | -0.973830 | 7.293184  | -0.625755 |
| C | 2.089687  | 5.559433  | 2.393351  |
| H | 3.123284  | 3.847836  | 3.234282  |
| H | 0.914588  | 7.070680  | 1.385829  |
| C | 4.053424  | -4.606131 | -0.453876 |
| H | 4.786203  | -2.601243 | -0.293382 |
| C | 5.600510  | 0.840319  | -0.811686 |
| C | 5.209617  | 0.505182  | 1.537486  |
| C | -2.890936 | -5.099113 | -1.832871 |
| H | -5.000875 | -4.582665 | -1.840882 |
| H | -0.764899 | -5.312084 | -1.787560 |

---

---

|   |           |           |           |
|---|-----------|-----------|-----------|
| C | -6.146644 | -2.001560 | 1.227652  |
| C | 2.929469  | -5.435625 | -0.576582 |
| H | 0.809522  | -5.511461 | -0.767777 |
| H | -2.597256 | 6.886117  | -2.475805 |
| H | 2.580060  | 6.269442  | 3.062333  |
| H | 5.055014  | -5.035387 | -0.378118 |
| C | 5.966131  | 1.055072  | 0.508871  |
| H | -3.049200 | -6.127351 | -2.166354 |
| H | -6.991373 | -2.685993 | 1.337103  |
| H | 3.041057  | -6.520636 | -0.580952 |
| H | 6.846007  | 1.658324  | 0.742771  |
| H | -4.972153 | -2.971656 | 2.750871  |
| H | -7.195072 | -0.698966 | -0.132788 |
| H | 6.206070  | 1.287576  | -1.599001 |
| H | 5.527815  | 0.684994  | 2.561606  |
| C | 3.360179  | -0.867983 | 2.557825  |
| C | 4.213225  | -0.069283 | -2.690203 |
| C | -5.243165 | 1.181492  | -0.797461 |
| C | -2.664514 | -1.431335 | 2.796155  |
| C | -1.722036 | -2.590709 | 2.421512  |
| H | -2.278647 | -3.536192 | 2.330882  |
| H | -1.224132 | -2.402229 | 1.463427  |
| H | -0.938056 | -2.724419 | 3.185765  |
| C | -1.888902 | -0.096035 | 2.806427  |
| H | -2.535359 | 0.744373  | 3.105734  |
| H | -1.057179 | -0.151878 | 3.528347  |
| H | -1.458842 | 0.144644  | 1.826056  |
| C | -3.187680 | -1.657977 | 4.232840  |
| H | -3.911401 | -0.880813 | 4.525935  |
| H | -3.666593 | -2.639714 | 4.361422  |
| H | -2.340787 | -1.616161 | 4.937742  |
| C | -6.712195 | 1.545743  | -1.091790 |
| H | -7.220940 | 0.786046  | -1.705158 |
| H | -7.292858 | 1.692767  | -0.167185 |
| H | -6.741189 | 2.492421  | -1.655527 |
| C | -4.522135 | 0.950739  | -2.141236 |
| H | -3.479804 | 0.645169  | -1.994332 |
| H | -5.017717 | 0.143690  | -2.704730 |
| H | -4.546816 | 1.862589  | -2.760929 |
| C | -4.628881 | 2.387653  | -0.042024 |
| H | -4.604291 | 3.275404  | -0.693831 |
| H | -5.222125 | 2.640285  | 0.851603  |
| H | -3.602413 | 2.196306  | 0.299908  |
| C | 4.136968  | -2.143371 | 2.965869  |

---

|   |          |           |           |
|---|----------|-----------|-----------|
| H | 5.206334 | -1.929230 | 3.119749  |
| H | 3.728910 | -2.549147 | 3.906527  |
| H | 4.051595 | -2.925066 | 2.197867  |
| C | 1.866895 | -1.237869 | 2.429541  |
| H | 1.252500 | -0.385190 | 2.111130  |
| H | 1.677119 | -2.077570 | 1.753780  |
| H | 1.502823 | -1.545479 | 3.422256  |
| C | 3.424918 | 0.137913  | 3.737863  |
| H | 2.849626 | -0.266280 | 4.584854  |
| H | 4.443757 | 0.318770  | 4.107056  |
| H | 2.978684 | 1.108126  | 3.469585  |
| C | 3.020696 | -0.927466 | -3.165440 |
| H | 3.096045 | -1.975954 | -2.852455 |
| H | 2.049570 | -0.530598 | -2.846865 |
| H | 3.021260 | -0.920729 | -4.267080 |
| C | 5.474423 | -0.703791 | -3.330159 |
| H | 5.338216 | -0.789565 | -4.420108 |
| H | 6.387340 | -0.117604 | -3.152307 |
| H | 5.640847 | -1.717609 | -2.931492 |
| C | 3.984275 | 1.351413  | -3.266395 |
| H | 4.827641 | 2.030820  | -3.075386 |
| H | 3.837669 | 1.295465  | -4.357178 |
| H | 3.080311 | 1.806401  | -2.831234 |

160

## 161 References

- 162 1. Santoro, F.; Lami, A.; Improta, R.; Bloino, J.; Barone, V., Effective method for the  
163 computation of optical spectra of large molecules at finite temperature including the Duschinsky and  
164 Herzberg-Teller effect: The Q(x) band of porphyrin as a case study. *Journal of Chemical Physics* **2008**,  
165 *128* (22), 17, doi:10.1063/1.2929846.
- 166 2. Niu, Y.; Peng, Q.; Deng, C.; Gao, X.; Shuai, Z., Theory of Excited State Decays and Optical  
167 Spectra: Application to Polyatomic Molecules. *Journal of Physical Chemistry A* **2010**, *114* (30), 7817-  
168 7831, doi:10.1021/jp101568f.
- 169 3. Peng, Q.; Niu, Y.; Deng, C.; Shuai, Z., Vibration correlation function formalism of radiative  
170 and non-radiative rates for complex molecules. *Chemical Physics* **2010**, *370* (1-3), 215-222,  
171 doi:10.1016/j.chemphys.2010.03.004.
- 172 4. Peng, Q.; Yi, Y.; Shuai, Z.; Shao, J., Excited state radiationless decay process with  
173 Duschinsky rotation effect: Formalism and implementation. *Journal of Chemical Physics* **2007**, *126*  
174 (11), 114302, doi:10.1063/1.2710274.
- 175 5. Niu, Y.; Peng, Q.; Shuai, Z., Promoting-mode free formalism for excited state radiationless  
176 decay process with Duschinsky rotation effect. *Science in China Series B-Chemistry* **2008**, *51* (12),  
177 1153-1158, doi:10.1007/s11426-008-0130-4.
- 178 6. Peng, Q.; Yi, Y.; Shuai, Z.; Shao, J., Toward quantitative prediction of molecular  
179 fluorescence quantum efficiency: Role of Duschinsky rotation. *Journal of the American Chemical*  
180 *Society* **2007**, *129* (30), 9333-9339, doi:10.1021/ja067946e.
- 181 7. Peng, Q.; Niu, Y.; Shi, Q.; Gao, X.; Shuai, Z., Correlation Function Formalism for Triplet  
182 Excited State Decay: Combined Spin-Orbit and Nonadiabatic Couplings. *Journal of Chemical Theory*  
183 *and Computation* **2013**, *9* (2), 1132-1143, doi:10.1021/ct300798t.
- 184 8. Eyring, H., The Activated Complex in Chemical Reactions. **1935**, *3* (2), 107-115,  
185 doi:10.1063/1.1749604.
- 186 9. Petersson, G. A., Perspective on "The activated complex in chemical reactions". *Theoretical*  
187 *Chemistry Accounts* **2000**, *103* (3), 190-195, doi:10.1007/s002149900102.
